# Supplementary material for: A physicochemical investigation of ionic liquid mixtures
Source: PubMed Central journal article supplement (PMC5811077; doi:10.1039/c4sc02931c), 2014-11-05
Supplement: SC-006-C4SC02931C-s001.pdf [file SC-006-C4SC02931C-s001.pdf]

## **A physicochemical investigation of ionic liquid mixtures**

Matthew T. Clough,<sup>a</sup> Colin R. Crick,<sup>a</sup> John Gräsvik,<sup>a</sup> Patricia A. Hunt,<sup>\*a</sup> Heiko Niedermeyer,<sup>a</sup> Tom Welton<sup>\*a</sup> and Oliver P. Whitaker<sup>b</sup>

<sup>a</sup> *Department of Chemistry, Imperial College London, London, SW7 2AZ, UK*

<sup>b</sup> *Tonbridge School, Tonbridge, Kent, TN9 1JP, UK*

*\* Corresponding Authors: p.hunt@imperial.ac.uk  
t.welton@imperial.ac.uk*

### **Electronic Supplementary Information**

|                                                                                       |           |
|---------------------------------------------------------------------------------------|-----------|
| <b>1. Laboratory procedures</b>                                                       | <b>2</b>  |
| <b>2. Synthesis of ionic liquids</b>                                                  | <b>3</b>  |
| <b>3. Molar volumes of ionic liquid mixtures</b>                                      | <b>7</b>  |
| <b>4. Phase behaviour / glass transition temperatures of ionic liquid mixtures</b>    | <b>10</b> |
| <b>5. Viscosities of ionic liquid mixtures</b>                                        | <b>13</b> |
| <b>6. Conductivities of ionic liquid mixtures</b>                                     | <b>14</b> |
| <b>7. Walden relationship of viscosity and conductivity for ionic liquid mixtures</b> | <b>15</b> |
| <b>8. Thermal stabilities of ionic liquid mixtures</b>                                | <b>18</b> |
| <b>9. Computational procedures</b>                                                    | <b>20</b> |
| <b>10. Molar volume calculations, charge arm calculations and Raman spectroscopy</b>  | <b>20</b> |

## 1. Laboratory procedures

### General Procedures

Prior to measurements, all samples were dried under vacuum until a water content of < 150 ppm (w/w) was established *via* Karl-Fischer titration.

### Density Measurements

Density measurements were performed in an Anton Paar 'DMA38' vibrating tube density meter at 25 °C. The error of the instrument given by the manufacturer was  $\pm 0.001 \text{ g cm}^{-3}$ , although the reproducibility was one order of magnitude better.

### Differential Scanning Calorimetry (DSC) Measurements

Differential Scanning Calorimetry (DSC) results were obtained using aluminium sample pans of diameter 7 mm. Between 7 - 9 mg of the ionic liquid was measured into the aluminium sample pan. A small incision was made in the tops of both the sample and reference pans. A drying procedure was then implemented: the sample pan was heated to 100 °C for 20 minutes in the calorimeter, to remove water. The sample pan was then quickly re-weighed, in order to determine the dry weight of the ionic liquid. The sample was measured between -100 and +100 °C, with a heating / cooling rate of 20 °C min<sup>-1</sup>.

### Viscosity Measurements

Viscosity measurements were performed on a TA instruments 'AR2000ex' rheometer fitted with a peltier plate at 25 °C, using a 40 mm, 2° steel cone. Measurements were performed at an angular velocity between 0.1 and 10 rad s<sup>-1</sup> under a nitrogen atmosphere. An error of 5% was established from the manufacturer's information and measurements on standard liquids, though reproducibility was usually better.

### Conductivity Measurements

The conductivity measurements were performed using a home-built conductivity probe with two platinum paddles of size approximately 5 mm × 5 mm. The temperature was kept at 25 °C using a water bath in a jacketed beaker attached to a recirculator and the samples were allowed to reach thermal equilibrium for 30 minutes. The measurements were performed under argon atmosphere on a CH Instruments CHI760C in a frequency range from 1 Hz to 1 × 10<sup>5</sup> Hz at an amplitude of 1 × 10<sup>-4</sup> V. Prior to each set of measurement the probe was calibrated using three commercially available standards (HANNA instruments) with known conductivities of 84  $\mu\text{S cm}^{-1}$ , 1413  $\mu\text{S cm}^{-1}$  and 12880  $\mu\text{S cm}^{-1}$ . The average error was found to be 2%.

### Thermogravimetric Analysis (TGA) Measurements

Temperature-ramped Thermogravimetric Analysis (TGA) experiments were performed on a PerkinElmer 'Pyris 1 TGA' thermogravimetric analyzer, using platinum sample pans of 6 mm diameter. TGA experiments were carried out in the range of 120 - 600 °C. Between 3 - 36 mg of the ionic liquid was measured into the platinum pan. A ramping rate of 10 °C min<sup>-1</sup> and a nitrogen flow of 20 ml min<sup>-1</sup> were used for temperature-ramped experiments. A drying procedure was employed, whereby the ionic liquid sample was maintained at 120 °C for a period of up to six hours, as appropriate. This drying procedure was justified since the onset decomposition temperature of each compound is higher by at least 150 °C than the 120 °C drying temperature, and the drying period is short. Therefore, actual decomposition of each ionic liquid during the drying period will be negligible.

### Raman Spectroscopy Measurements

Raman measurements were performed using a custom built Raman microscope described previously,<sup>1,2</sup> using a laser power of 8.1 mW focused with a 40x objective (Olympus UAPO40X3/340, 40x, 0.6 NA). The exposure time for each spectrum was 2 seconds.

## 2. Synthesis of ionic liquids

All reagents used were obtained from VWR or Fisher Scientific at highest purity, and were dried using suitable drying agents. The cations and anions incorporated into the investigated ionic liquid mixtures are displayed below (Fig. E1). The synthesis of ionic liquids is described below.

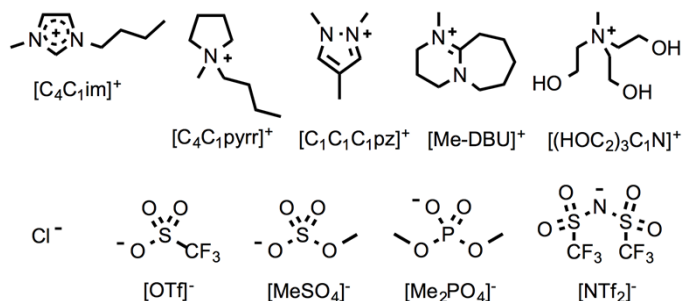

**Fig. E1:** Ionic liquids cations and anions incorporated into this investigation; 1-butyl-3-methylimidazolium ( $[C_4C_1im]^+$ ), 1-methyl-1-butylpyrrolidinium ( $[C_4C_1pyrr]^+$ ), 1,2,4-trimethylpyrazolium ( $[C_1C_1C_1pz]^+$ ), 1-methyl-1,8-diazabicyclo[5.4.0]undec-7-enium ( $[Me-DBU]^+$ ) and triethanolmethylammonium ( $[(HOC_2)_3C_1N]^+$ ) cations, chloride ( $Cl^-$ ), trifluoromethanesulfonate ( $[OTf]^-$ ), methyl sulfate ( $[MeSO_4]^-$ ), dimethyl phosphate ( $[Me_2PO_4]^-$ ) and *bis*(trifluoromethanesulfonyl)imide ( $[NTf_2]^-$ ) anions.

**Table E1:** Ionic liquid binary and reciprocal binary mixtures investigated in this contribution, **1-11**. For each mixture, the molar quantities,  $\chi$ , of the two constituent ionic liquids were varied.

| Ionic Liquid Mixture                    | Constituent ILs                                   |
|-----------------------------------------|---------------------------------------------------|
| 1 $[C_4C_1im]Cl[OTf]$                   | $[C_4C_1im]Cl$<br>$[C_4C_1im][OTf]$               |
| 2 $[C_4C_1im][MeSO_4][Me_2PO_4]$        | $[C_4C_1im][MeSO_4]$<br>$[C_4C_1im][Me_2PO_4]$    |
| 3 $[C_4C_1im][OTf][NTf_2]$              | $[C_4C_1im][OTf]$<br>$[C_4C_1im][NTf_2]$          |
| 4 $[C_4C_1im][(HOC_2)_3C_1N][MeSO_4]$   | $[C_4C_1im][MeSO_4]$<br>$[(HOC_2)_3C_1N][MeSO_4]$ |
| 5 $[C_4C_1im][MeSO_4][NTf_2]$           | $[C_4C_1im][MeSO_4]$<br>$[C_4C_1im][NTf_2]$       |
| 6 $[C_4C_1pyrr][NTf_2][Me_2PO_4]$       | $[C_4C_1pyrr][NTf_2]$<br>$[C_4C_1pyrr][Me_2PO_4]$ |
| 7 $[C_4C_1im][NTf_2][Me_2PO_4]$         | $[C_4C_1im][NTf_2]$<br>$[C_4C_1im][Me_2PO_4]$     |
| 8 $[C_4C_1im][Me-DBU][MeSO_4]$          | $[C_4C_1im][MeSO_4]$<br>$[Me-DBU][MeSO_4]$        |
| 9 $[C_4C_1im][C_1C_1C_1pz][OTf]$        | $[C_4C_1im][OTf]$<br>$[C_1C_1C_1pz][OTf]$         |
| 10 $[C_4C_1im][Me-DBU][MeSO_4][NTf_2]$  | $[C_4C_1im][NTf_2]$<br>$[Me-DBU][MeSO_4]$         |
| 11 $[C_4C_1im][C_4C_1pyrr][OTf][NTf_2]$ | $[C_4C_1im][OTf]$<br>$[C_4C_1pyrr][NTf_2]$        |

**1-Butyl-3-methylimidazolium chloride.** A solution of 1-methylimidazole (210.3 ml, 2.65 mol) in EtOAc (180 ml) was cooled in an ice bath, and 1-chlorobutane (375.0 ml, 3588 mmol) was added dropwise. The resulting liquid was stirred at 45 °C for 14 days. During this time the single-phase solution separated in two layers. After two days at -20 °C white crystals had formed, which were washed repeatedly with EtOAc (3 × 180 ml) and were subsequently dried under vacuum, to yield 1-butyl-3-methylimidazolium chloride (224.47 g, 48.5%).  $\delta_H$  (ppm) (400 MHz, CDCl<sub>3</sub>) 10.58 (s, 1H, NCHN), 7.60 (s, 1H, NCHCHN), 7.43 (s, 1H, NCHCHN), 4.23 (t, J = 7 Hz, 2H, NCH<sub>2</sub>CH<sub>2</sub>), 4.03 (s, 3H, NCH<sub>3</sub>), 1.90 - 1.73 (m, 2H, CH<sub>2</sub>CH<sub>2</sub>CH<sub>2</sub>), 1.35 - 1.18 (m, 2H, CH<sub>2</sub>CH<sub>2</sub>CH<sub>3</sub>), 0.86 (t, J = 7 Hz, 3H, CH<sub>2</sub>CH<sub>3</sub>).  $\delta_C$  (ppm) (101 MHz, CDCl<sub>3</sub>) 137.83 (s, NCHN), 123.67 (s, NCHCHN), 121.98 (s, NCHCHN), 49.69 (s, NCH<sub>2</sub>CH<sub>2</sub>), 36.47 (s, NCH<sub>3</sub>), 32.11 (s, CH<sub>2</sub>CH<sub>2</sub>CH<sub>2</sub>), 19.38 (s, CH<sub>2</sub>CH<sub>2</sub>CH<sub>3</sub>), 13.37 (s, CH<sub>2</sub>CH<sub>3</sub>). *m/z* (LSIMS<sup>+</sup>): 139 ([C<sub>4</sub>C<sub>1</sub>im]<sup>+</sup>, 100%), 313 ([{C<sub>4</sub>C<sub>1</sub>im]<sub>2</sub>Cl]<sup>+</sup>, 10%). *m/z* (LSIMS<sup>-</sup>): 35 (<sup>35</sup>Cl<sup>-</sup>, 80%), 209 ([{C<sub>4</sub>C<sub>1</sub>im]<sub>2</sub>Cl]<sup>-</sup>, 65%).

**1-Butyl-3-methylimidazolium trifluoromethanesulfonate.** A solution of 1-butyl-3-methylimidazolium chloride (145.59 g, 833 mmol) in CH<sub>2</sub>Cl<sub>2</sub> (500 ml) was added to lithium trifluoromethanesulfonate (134.12 g, 860 mmol), and the resulting slurry was stirred for 60 hours at room temperature. The white precipitate was filtered off, and the remaining liquid was diluted with CH<sub>2</sub>Cl<sub>2</sub> to a total volume of ~ 850 ml. The diluted solution was subsequently washed with water (34 × 3 ml) until halide free by AgNO<sub>3</sub> test. The solvent was evaporated under vacuum, to yield 1-butyl-3-methylimidazolium trifluoromethanesulfonate as a colourless, free-flowing liquid (193.18 g, 80.4%).  $\delta_H$  (ppm) (400 MHz, CDCl<sub>3</sub>) 8.77 (s, 1H, NCHN), 7.30 - 7.24 (m, 2H, NCHCHN), 3.98 (t, J = 7 Hz, 2H, NCH<sub>2</sub>CH<sub>2</sub>), 3.74 (s, 3H, NCH<sub>3</sub>), 1.70 - 1.56 (m, 2H, CH<sub>2</sub>CH<sub>2</sub>CH<sub>2</sub>), 1.19 - 1.04 (m, 2H, CH<sub>2</sub>CH<sub>2</sub>CH<sub>3</sub>), 0.70 (t, J = 6 Hz, 3H, CH<sub>2</sub>CH<sub>3</sub>).  $\delta_C$  (ppm) (101 MHz, CDCl<sub>3</sub>) 135.94 (s, NCHN), 123.47 (s, NCHCHN), 122.21 (s, NCHCHN), 120.38 (q, J = 320 Hz, CF<sub>3</sub>SO<sub>3</sub>), 49.35 (s, NCH<sub>2</sub>CH<sub>2</sub>), 35.82 (s, NCH<sub>3</sub>), 31.55 (s, CH<sub>2</sub>CH<sub>2</sub>CH<sub>2</sub>), 18.91 (s, CH<sub>2</sub>CH<sub>2</sub>CH<sub>3</sub>), 12.87 (s, CH<sub>2</sub>CH<sub>3</sub>). *m/z* (ESI<sup>+</sup>): 139 ([C<sub>4</sub>C<sub>1</sub>im]<sup>+</sup>, 100%), 427 ([{C<sub>4</sub>C<sub>1</sub>im]<sub>2</sub>[OTf]<sup>+</sup>, 40%). *m/z* (ESI<sup>-</sup>): 149 ([OTf]<sup>-</sup>, 85%), 437 ([{C<sub>4</sub>C<sub>1</sub>im}[OTf]<sub>2</sub>]<sup>-</sup>, 100%), 725 ([{C<sub>4</sub>C<sub>1</sub>im]<sub>2</sub>[OTf]<sub>3</sub>]<sup>-</sup>, 20%). Elemental analysis (expected): C 37.35% (37.50%), H 5.24% (5.24%), N 9.60% (9.72%).  $\nu/cm^{-1}$  (neat): 3114 (aromatic C-H stretch, m), 2965 (aliphatic C-H stretch, m), 1575 (aromatic ring def, m), 1467 (aliphatic C-H bend, w), 1256 (asym. S-O stretch, s), 1225 (C-S stretch, s), 1156 (asymm. C-F stretch, s), 1030 (symm. S-O and C-F str., s).

**1-Butyl-3-methylimidazolium bis(trifluoromethanesulfonyl)imide.** A solution of 1-butyl-3-methylimidazolium chloride (67.80 g, 388 mmol) in CH<sub>2</sub>Cl<sub>2</sub> (200 ml) was added to lithium bis(trifluoromethanesulfonyl)imide (117.00 g, 408 mmol), and the resulting slurry was stirred for 60 hours at room temperature. The white precipitate was filtered off and the remaining liquid was diluted with CH<sub>2</sub>Cl<sub>2</sub> to a total volume of ~ 750 ml. The diluted solution was subsequently washed with water (8 × 100 ml) until halide free by AgNO<sub>3</sub> test. The solvent was evaporated under vacuum to yield 1-butyl-3-methylimidazolium bis(trifluoromethanesulfonyl)imide as a colourless, free-flowing liquid (144.25 g, 89%).  $\delta_H$  (ppm) (400 MHz, CDCl<sub>3</sub>) 8.46 (s, 1H, NCHN), 7.37 (t, J = 2 Hz, 1H, NCHCHN), 7.29 (t, J = 2 Hz, 1H, NCHCHN), 4.07 (t, J = 7 Hz, 2H, NCH<sub>2</sub>CH<sub>2</sub>), 3.80 (s, 3H, NCH<sub>3</sub>), 1.82 - 1.68 (m, 2H, CH<sub>2</sub>CH<sub>2</sub>CH<sub>2</sub>), 1.30 - 1.15 (m, 2H, CH<sub>2</sub>CH<sub>2</sub>CH<sub>3</sub>), 0.79 (t, J = 7 Hz, 3H, CH<sub>2</sub>CH<sub>3</sub>).  $\delta_C$  (ppm) (101 MHz, CDCl<sub>3</sub>) 135.94 (s, NCHN), 123.40 (s, NCHCHN), 122.15 (s, NCHCHN), 119.81 (q, J = 321 Hz, (CF<sub>3</sub>O<sub>2</sub>S)<sub>2</sub>N), 49.36 (s, NCH<sub>2</sub>CH<sub>2</sub>), 35.47 (s, NCH<sub>3</sub>), 31.51 (s, CH<sub>2</sub>CH<sub>2</sub>CH<sub>2</sub>), 18.85 (s, CH<sub>2</sub>CH<sub>2</sub>CH<sub>3</sub>), 12.36 (s, CH<sub>2</sub>CH<sub>3</sub>). *m/z* (ESI<sup>+</sup>): 139 ([C<sub>4</sub>C<sub>1</sub>im]<sup>+</sup>, 100%), 558 ([{C<sub>4</sub>C<sub>1</sub>im]<sub>2</sub>[NTf<sub>2</sub>]<sup>+</sup>, 55%). *m/z* (ESI<sup>-</sup>): 280 ([NTf<sub>2</sub>]<sup>-</sup>, 100%). Elemental analysis (expected): C 28.75% (28.64%), H 3.66% (3.61%), N 9.89% (10.02%).  $\nu/cm^{-1}$  (neat): 3157 (aromatic C-H stretch, m), 2967 (aliphatic C-H stretch, m), 1569 (aromatic ring def., m), 1466 (aliphatic C-H bend, w), 1348 1330 (asym. S-O stretch, s), 1181 1136 (asym. C-F str., s), 1054 (asym. S-N str., s).

**1-Butyl-3-methylimidazolium methyl sulfate.** To an ice-cooled solution of 1-butylimidazole (207.18 g, 1.67 mol) in toluene (300 mL), dimethyl sulfate (209.80 g, 1.66 mol) was slowly added dropwise. The resulting mixture was stirred for 72 hours, during which time the solution had separated into two phases. The toluene phase was separated off and the ionic liquid phase was washed with toluene (3 × 300 ml). The remaining solvent was evaporated under vacuum, to yield 1-butyl-3-methylimidazolium methyl sulfate as a light yellow, free-flowing liquid (351.86 g, 84%). The liquid was stirred with activated charcoal for three days and filtered through a pad of neutral alumina to obtain a colorless liquid.  $\delta_H$  (ppm) (400 MHz, CDCl<sub>3</sub>) 9.13 (s, 1H, NCHN), 7.37 (t, J = 2 Hz, 1H, NCHCHN), 7.32 (t, J = 2 Hz, 1H, NCHCHN), 4.00 (t, J = 7 Hz, 2H, NCH<sub>2</sub>CH<sub>2</sub>), 3.76 (s, 3H, NCH<sub>3</sub>), 3.44 (s, 3H, CH<sub>3</sub>SO<sub>4</sub>), 1.67 - 1.55 (m, 2H, CH<sub>2</sub>CH<sub>2</sub>CH<sub>2</sub>), 1.16 - 1.03 (m, 2H, CH<sub>2</sub>CH<sub>2</sub>CH<sub>3</sub>), 0.68 (t,

$J = 7$  Hz, 3H,  $\text{CH}_2\text{CH}_3$ ).  $\delta_{\text{C}}$  (ppm) (101 MHz,  $\text{CDCl}_3$ ) 136.64 (s, NCHN), 123.61 (s, NCHCHN), 122.31 (s, NCHCHN), 53.00 (s,  $\text{CH}_3\text{SO}_4$ ), 48.51 (s,  $\text{NCH}_2\text{CH}_2$ ), 35.67 (s,  $\text{NCH}_3$ ), 31.41 (s,  $\text{CH}_2\text{CH}_2\text{CH}_2$ ), 18.79 (s,  $\text{CH}_2\text{CH}_2\text{CH}_3$ ), 13.24 (s,  $\text{CH}_2\text{CH}_3$ ).  $m/z$  (ESI<sup>+</sup>): 139 ( $[\text{C}_4\text{C}_1\text{im}]^+$ , 100%), 389 ( $[\{\text{C}_4\text{C}_1\text{im}\}_2[\text{MeSO}_4]\}^+$ , 20%).  $m/z$  (ESI<sup>-</sup>): 111 ( $[\text{MeSO}_4]^-$ , 100%), 361 ( $[\{\text{C}_4\text{C}_1\text{im}\}[\text{MeSO}_4]_2]^-$ , 40%), 611 ( $[\{\text{C}_4\text{C}_1\text{im}\}_2[\text{MeSO}_4]_3]^-$ , 55%). Elemental analysis (expected): C 43.30% (43.18%), H 7.42% (7.25%), N 11.10% (11.19%).  $\nu/\text{cm}^{-1}$  (neat): 3103 (aromatic C–H str., w), 2961 (aliphatic C–H str., w), 1573 (ring def., m), 1466 (aliphatic C–H bend, m), 1221 (asym. S–O str., s), 1169 (asym. S–O str., m), 1059 (O–C str., m), 1007 (sym. O–S, s), 731 (S–O str., s).

**1-Butyl-3-methylimidazolium dimethyl phosphate.** To a solution of 1-butylimidazole (105.27 g, 848 mmol) in toluene (100 ml), trimethyl phosphate (113.19 g, 808 mmol) was added dropwise. The resulting mixture was stirred at 80 °C for 22 hours, and subsequently was cooled in the freezer at -23 °C for 2.5 hours. The clear, colourless liquid remained as one phase, and was therefore stirred at 90 °C for a further 64 hours. The yellow liquid was cooled in the freezer at -23 °C for 2.5 hours. As no phase separation occurred, the liquid was diluted with toluene (400 ml), upon which phase separation did occur. The toluene phase was separated off, and the ionic liquid phase was washed with toluene (3 × 300 ml). The remaining solvent was evaporated under vacuum, to yield 1-butyl-3-methylimidazolium dimethyl phosphate as a light yellow, free-flowing liquid (210.72 g, 94%).  $\delta_{\text{H}}$  (ppm) (400 MHz, DMSO- $d_6$ ) 9.64 (s, 1H, NCHN), 7.88 (t,  $J = 2$  Hz, 1H, NCHCHN), 7.80 (t,  $J = 2$  Hz, 1H, NCHCHN), 4.18 (t,  $J = 7$  Hz, 2H,  $\text{NCH}_2\text{CH}_2$ ), 3.87 (s, 3H,  $\text{NCH}_3$ ), 3.27 (d, 6H,  $(\text{CH}_3)_2\text{PO}_4$ ), 1.81 - 1.71 (m, 2H,  $\text{CH}_2\text{CH}_2\text{CH}_2$ ), 1.31 - 1.18 (m, 2H,  $\text{CH}_2\text{CH}_2\text{CH}_3$ ), 0.88 (t,  $J = 7$  Hz, 3H,  $\text{CH}_2\text{CH}_3$ ).  $\delta_{\text{C}}$  (ppm) (101 MHz, DMSO- $d_6$ ) 137.27 (s, NCHN), 123.61 (s, NCHCHN), 122.32 (s, NCHCHN), 51.24 (d,  $J = 6$  Hz,  $(\text{CH}_3)_2\text{PO}_4$ ), 48.36 (s,  $\text{NCH}_2\text{CH}_2$ ), 35.56 (s,  $\text{NCH}_3$ ), 31.43 (s,  $\text{CH}_2\text{CH}_2\text{CH}_2$ ), 18.77 (s,  $\text{CH}_2\text{CH}_2\text{CH}_3$ ), 13.25 (s,  $\text{CH}_2\text{CH}_3$ ).  $\delta_{\text{P}}$  (ppm) (162 MHz, DMSO- $d_6$ ) 1.51 (s,  $(\text{CH}_3)_2\text{PO}_4$ ).  $m/z$  (ESI<sup>+</sup>): 139 ( $[\text{C}_4\text{C}_1\text{im}]^+$ , 100%), 403 ( $[\{\text{C}_4\text{C}_1\text{im}\}_2[\text{Me}_2\text{PO}_4]\}^+$ , 40%).  $m/z$  (ESI<sup>-</sup>): 125 ( $[\text{Me}_2\text{PO}_4]^-$ , 100%). Elemental analysis (expected): C 28.75% (28.64%), H 3.66% (3.61%), N 9.89% (10.02%).  $\nu/\text{cm}^{-1}$  (neat): 3049 (aromatic C–H str., wb), 2959 2939 2875 2835 (aliph. C–H str., m), 1569 (aromatic ring def., m), 1465n(aliphatic C–H bend, m), 1243 (asym. P–O str., s), 1178 (sym. O–C str., m), 1092 (asym. O–C str., m), 1044 (sym. P–O str., s), 770 (asym. P–O str., s), 730 (sym P–O str., m).

**1-Butyl-1-methylpyrrolidinium bis(trifluoromethanesulfonyl)imide.** A solution of 1-butyl-1-methylpyrrolidinium chloride (38 g, 214 mmol) in  $\text{CH}_2\text{Cl}_2$  (150 ml) was added to lithium bis(trifluoromethanesulfonyl)imide (70 g, 244 mmol), and the resulting slurry was stirred for 24 hours at room temperature. The white precipitate was filtered off, and the remaining liquid was diluted with  $\text{CH}_2\text{Cl}_2$  to a total volume of ~ 750 ml. The diluted solution was subsequently washed with water (7 × 100 ml) until halide free by  $\text{AgNO}_3$  test. The solvent was removed under vacuum, to yield 1-butyl-1-methylpyrrolidinium bis(trifluoromethanesulfonyl)imide as a colorless, free-flowing liquid (72.20 g, 80%).  $\delta_{\text{H}}$  (ppm) (500 MHz, DMSO- $d_6$  capillary) 3.01 - 2.87 (m, 4H,  $\text{NCH}_2\text{CH}_2$ ), 2.79 - 2.69 (m, 2H,  $\text{NCH}_2$ ), 2.44 (s, 3H,  $\text{NCH}_3$ ), 1.69 - 1.58 (m, 4H,  $\text{N}(\text{CH}_2)_2(\text{CH}_2)_2$ ), 1.24 - 1.14 (m, 2H,  $\text{NCH}_2\text{CH}_2\text{CH}_2$ ), 0.88 - 0.77 (m, 2H,  $\text{NCH}_2\text{CH}_2\text{CH}_2\text{CH}_3$ ), 0.40 (t,  $J = 7$  Hz, 3H,  $\text{NCH}_2\text{CH}_2\text{CH}_2\text{CH}_3$ ).  $\delta_{\text{C}}$  (ppm) (126 MHz, DMSO- $d_6$  capillary) 118.86 (q,  $J = 321$  Hz,  $(\text{CF}_3\text{O}_2\text{S})_2\text{N}$ ), 63.07 (s,  $\text{N}(\text{CH}_2)_2$ ), 63.02 (s,  $\text{N}(\text{CH}_2)_2(\text{CH}_2)_2$ ), 46.69 (s,  $\text{NCH}_3$ ), 24.18 (s,  $\text{NCH}_2\text{CH}_2\text{CH}_2\text{CH}_3$ ), 20.04 (s,  $\text{NCH}_2\text{CH}_2\text{CH}_2\text{CH}_3$ ), 18.14 (s,  $\text{NCH}_2\text{CH}_2\text{CH}_2\text{CH}_3$ ), 11.56 (s,  $\text{NCH}_2\text{CH}_2\text{CH}_2\text{CH}_3$ ).  $m/z$  (ESI<sup>+</sup>): 142 ( $[\text{C}_4\text{C}_1\text{pyrr}]^+$ , 45%), 564 ( $[\{\text{C}_4\text{C}_1\text{pyrr}\}_2[\text{NTf}_2]\}^+$ , 100%).  $m/z$  (ESI<sup>-</sup>): 280 ( $[\text{NTf}_2]^-$ , 100%), 702 ( $[\{\text{C}_4\text{C}_1\text{pyrr}\}[\text{NTf}_2]_2]^-$ , 10%). Elemental analysis (expected): C 31.38% (31.28%), H 4.69% (4.77%), N 6.55% (6.63%).  $\nu/\text{cm}^{-1}$  (neat): 2970 (ring C–H str., w), 2882 (aliphatic C–H str., w), 1467 (C–H bend, m), 1348 1330 (asym. S–O str., s), 1180 1135 (asym. C–F str., s), 1053 (asym S–N str., s), 928 (ring breathing vibration, w).

**1-Butyl-1-methylpyrrolidinium dimethyl phosphate.** To a solution of 1-butylpyrrolidine (90.95 g, 715 mmol) in toluene (100 ml), trimethyl phosphate (72.0 g, 616 mmol) was added dropwise. The resulting mixture was stirred at 80 °C for 24 hours. The resulting liquid was diluted with toluene (400 ml), upon which phase separation occurred. The toluene phase was separated off, and the ionic liquid phase was washed with toluene (3 × 300 ml). The remaining solvent was evaporated under vacuum, to yield 1-butyl-1-methylpyrrolidinium dimethyl phosphate as a pale yellow solid (140.66 g, 74%).  $\delta_{\text{H}}$  (ppm) (400 MHz, DMSO- $d_6$ ) 3.58 - 3.43 (m, 4H,  $\text{N}(\text{CH}_2)_2(\text{CH}_2)_2$ ), 3.41 - 3.32 (m, 2H,  $\text{NCH}_2$ ), 3.24 (d,  $J = 10$  Hz, 6H,  $(\text{CH}_3)_2\text{PO}_4$ ), 3.01 (s, 3H,  $\text{NCH}_3$ ), 2.12 - 1.99 (m, 4H,  $\text{N}(\text{CH}_2)_2(\text{CH}_2)_2$ ), 1.72 - 1.61 (m, 2H,  $\text{NCH}_2\text{CH}_2\text{CH}_2$ ), 1.36 - 1.24 (m, 2H,  $\text{NCH}_2\text{CH}_2\text{CH}_2\text{CH}_3$ ), 0.91 (t,  $J = 7$  Hz, 3H,  $\text{NCH}_2\text{CH}_2\text{CH}_2\text{CH}_3$ ).  $\delta_{\text{C}}$  (ppm) (101 MHz, DMSO- $d_6$ ) 63.09 (s,  $\text{N}(\text{CH}_2)_2(\text{CH}_2)_2$ ), 62.55 (s,  $\text{N}(\text{CH}_2)_2(\text{CH}_2)_2$ ), 51.16 (d,  $J = 6$  Hz,  $(\text{CH}_3)_2\text{PO}_4$ ), 47.13 (s,  $\text{NCH}_3$ ), 24.97 (s,

NCH<sub>2</sub>CH<sub>2</sub>CH<sub>2</sub>CH<sub>3</sub>), 20.98 (s, NCH<sub>2</sub>CH<sub>2</sub>CH<sub>2</sub>CH<sub>3</sub>), 19.30 (s, NCH<sub>2</sub>CH<sub>2</sub>CH<sub>2</sub>CH<sub>3</sub>), 13.49 (s, NCH<sub>2</sub>CH<sub>2</sub>CH<sub>2</sub>CH<sub>3</sub>).  $\delta_P$  (ppm) (162 MHz, DMSO-d<sub>6</sub>) 1.39 (s, (CH<sub>3</sub>)<sub>2</sub>PO<sub>4</sub>).  $m/z$  (ESI<sup>+</sup>): 142 ([C<sub>4</sub>C<sub>1</sub>pyrr]<sup>+</sup>, 100%), 409 ([{C<sub>4</sub>C<sub>1</sub>pyrr]<sub>2</sub>[Me<sub>2</sub>PO<sub>4</sub>]<sup>+</sup>, 10%).  $m/z$  (ESI<sup>-</sup>): 125 ([Me<sub>2</sub>PO<sub>4</sub>]<sup>-</sup>, 20%), 392 ([{C<sub>4</sub>C<sub>1</sub>pyrr][Me<sub>2</sub>PO<sub>4</sub>]<sub>2</sub><sup>-</sup>, 10%). Elemental analysis (expected): C 49.29% (49.43%), H 11.34% (9.80%), N 4.61% (5.24%).  $\nu/cm^{-1}$  (neat): 2963 2941 (C–H str., mb), 1479 (C–H bend., m), 1248 (asym. P–O str., s), 1179 (sym. O–C str, w), 1093 (asym. O–C str., m), 1044 (sym P–O str., s), 937 (ring breathing, w), 768 (asym. p–O str., s).

**1-Methyl-1,8-diazabicyclo[5.4.0]undec-7-enium methyl sulfate.** To an ice-cooled solution of 1,8-diazabicyclo[5.4.0]undec-7-ene (DBU) (98.34 g, 646 mmol) in toluene (120 ml), dimethyl sulfate (78.77 g, 625 mmol) was slowly added dropwise. The resulting mixture was stirred for 17 hours, during which time the solution had separated into two phases. The toluene phase was separated off, and the ionic liquid phase was washed with toluene (3 × 150 ml). The remaining solvent was removed under vacuum, to yield 1-methyl-1,8-diazabicyclo[5.4.0]undec-7-enium methyl sulfate as a pale yellow, free-flowing liquid. This liquid solidified upon repeated extraction with toluene, and a white solid was obtained (171.14 g, 98%).  $\delta_H$  (ppm) (400 MHz, DMSO-d<sub>6</sub>) 3.67 - 3.59 (m, 2H, NCH<sub>2</sub>C<sub>4</sub>H<sub>8</sub>N), 3.47 (t, J = 6 Hz, 2H, NCH<sub>2</sub>C<sub>2</sub>H<sub>4</sub>N), 3.42 (t, J = 6 Hz, 2H, NCH<sub>2</sub>C<sub>2</sub>H<sub>4</sub>N), 3.37 (s, 3H, CH<sub>3</sub>SO<sub>4</sub>), 3.20 (s, 3H, NCH<sub>3</sub>), 2.88 - 2.80 (m, 2H, C<sub>q</sub>CH<sub>2</sub>C<sub>4</sub>H<sub>8</sub>N), 2.01 - 1.92 (m, 2H, NCH<sub>2</sub>CH<sub>2</sub>CH<sub>2</sub>N), 1.72 - 1.56 (m, 6H, CH<sub>2</sub>C<sub>3</sub>H<sub>6</sub>CH<sub>2</sub>N).  $\delta_C$  (ppm) (101 MHz, DMSO-d<sub>6</sub>) 166.03 (s, C<sub>q</sub>), 53.84 (s, NCH<sub>2</sub>C<sub>4</sub>H<sub>8</sub>), 52.81 (s, CH<sub>3</sub>SO<sub>4</sub>), 48.13 (s, NCH<sub>2</sub>C<sub>2</sub>H<sub>4</sub>N), 48.08 (s, NCH<sub>2</sub>C<sub>2</sub>H<sub>4</sub>N), 40.55 (s, NCH<sub>3</sub>), 27.83 (s, CH<sub>2</sub>C<sub>3</sub>H<sub>6</sub>CH<sub>2</sub>), 27.46 (s, C<sub>q</sub>CH<sub>2</sub>C<sub>4</sub>H<sub>8</sub>N), 25.65 (s, CH<sub>2</sub>C<sub>3</sub>H<sub>6</sub>CH<sub>2</sub>), 21.73 (s, CH<sub>2</sub>C<sub>3</sub>H<sub>6</sub>CH<sub>2</sub>), 19.43 (s, NCH<sub>2</sub>CH<sub>2</sub>CH<sub>2</sub>N).  $m/z$  (ESI<sup>+</sup>): 167 ([Me-DBU]<sup>+</sup>, 100%), 445 ([{Me-DBU}<sub>2</sub>[MeSO<sub>4</sub>]<sup>+</sup>, 10%).  $m/z$  (ESI<sup>-</sup>): 111 ([MeSO<sub>4</sub>]<sup>-</sup>, 100%). Elemental analysis (expected): C 47.63% (47.46%), H 7.86% (7.97%), N 9.99% (10.06%).  $\nu/cm^{-1}$  (neat): 2938 (C–H str., m), 1625 (asym. N–C–N str., s), 1220 (asym. S–O str., s), 1196 (asym. S–O str., m), 1059 (O–C str., m), 1009 (sym. O–S, s), 723 (S–O str., s).

**1,2,4-Trimethylpyrazolium trifluoromethanesulfonate.** Methyl trifluoromethanesulfonate (50.00 g, 305 mmol) was distilled directly into an ice-cooled flask of 1,3-dimethylpyrazole (100.54 g, 1.05 mol), with vigorous stirring. The resulting liquid was stirred for an hour, and was extracted with toluene, initially in a separation funnel (6 × 100 ml), and subsequently for 24 hours in a continuous extractor. Remaining solvent was removed under vacuum and the product was filtered through a layer of basic alumina, to yield 1,2,4-trimethylpyrazolium trifluoromethanesulfonate.  $\delta_H$  (ppm) (400 MHz, DMSO-d<sub>6</sub>) 8.23 (s, 2H, CH), 4.05 (s, 6H, NCH<sub>3</sub>), 2.08 (s, 3H, CCH<sub>3</sub>).  $\delta_C$  (ppm) (101 MHz, DMSO-d<sub>6</sub>) 136.38 (s, CH), 120.75 (q, J = 323 Hz, CF<sub>3</sub>SO<sub>3</sub>), 116.62 (s, CCH<sub>3</sub>), 36.24 (s, NCH<sub>3</sub>), 8.23 (s, CCH<sub>3</sub>).  $m/z$  (ESI<sup>+</sup>): 111 ([C<sub>1</sub>C<sub>1</sub>C<sub>1</sub>pz]<sup>+</sup>, 50%), 371 ([{C<sub>1</sub>C<sub>1</sub>C<sub>1</sub>pz]<sub>2</sub>[OTf]<sup>+</sup>, 100%).  $m/z$  (ESI<sup>-</sup>): 149 ([OTf]<sup>-</sup>, 100%), 409 ([{C<sub>1</sub>C<sub>1</sub>C<sub>1</sub>pz}[OTf]<sub>2</sub><sup>-</sup>, 30%). Elemental analysis (expected): C 32.28% (32.31%), H 4.29% (4.26%), N 10.84% (10.76%).  $\nu/cm^{-1}$  (neat): 3129 (arom. C–h str, w), 3038 2961 (aliphatic C–H str., w), 1451 (C–H bend., m), 1404 1369 (ring str., m), 1254 (asym. S–O stretch, s), 1224 (C–S stretch, s), 1152 (asymm. C–F stretch, s), 1029 (symm. S–O and C–F str., s), 850 (ring C–H bend, m).

**Triethanolmethylammonium methyl sulfate.** To an ice-cooled biphasic mixture of triethanolamine (74.2 g, 497 mmol) and EtOAc (210 ml), dimethyl sulfate (63.8 g, 506 mmol) was added dropwise with vigorous stirring. The liquid was stirred for a further two hours. The organic phase was separated off, and the ionic liquid phase was extracted with toluene (3 × 50ml). The remaining solvent was removed under vacuum. Residual triethanolamine was removed from the product by continuous extraction with CHCl<sub>3</sub> until no starting material could be found. Remaining solvent was removed under vacuum, to yield triethanolmethylammonium methyl sulfate as a pale orange, free-flowing liquid (97.1 g, 71%).  $\delta_H$  (ppm) (400 MHz, DMSO-d<sub>6</sub>) 5.20 (s, 3H, OH), 3.83 (s, 6H, CH<sub>2</sub>OH), 3.56 - 3.47 (m, 6H, CH<sub>2</sub>CH<sub>2</sub>OH), 3.37 (s, 3H, CH<sub>3</sub>SO<sub>4</sub>), 3.13 (s, 3H, NCH<sub>3</sub>).  $\delta_C$  (ppm) (101 MHz, DMSO-d<sub>6</sub>) 64.24 (s, NCH<sub>2</sub>CH<sub>2</sub>OH), 55.01 (s, CH<sub>2</sub>OH), 53.15 (s, CH<sub>3</sub>SO<sub>4</sub>), 49.73 (s, NCH<sub>3</sub>).  $m/z$  (LSIMS<sup>+</sup>): 164 ([{(C<sub>2</sub>OH)<sub>3</sub>C<sub>1</sub>N]<sup>+</sup>, 100%).  $m/z$  (LSIMS<sup>-</sup>): 111 ([MeSO<sub>4</sub>]<sup>-</sup>, 100%), 386 ([{(C<sub>2</sub>OH)<sub>3</sub>C<sub>1</sub>N][MeSO<sub>4</sub>]<sub>2</sub><sup>-</sup>, 10%). Elemental analysis (expected): C 35.05% (34.90%), H 7.79% (7.69%), N 5.09% (5.09%).  $\nu/cm^{-1}$  (neat): 3384 (O–H str., mb), 2952 (C–H str, w), 1464 (C–H bend., m), 1204 (asym. S–O str., s), 1056 (O–C str., s), 999 (sym. O–S, s), 757 (S–O str., s).

### 3. Molar volumes of ionic liquid mixtures

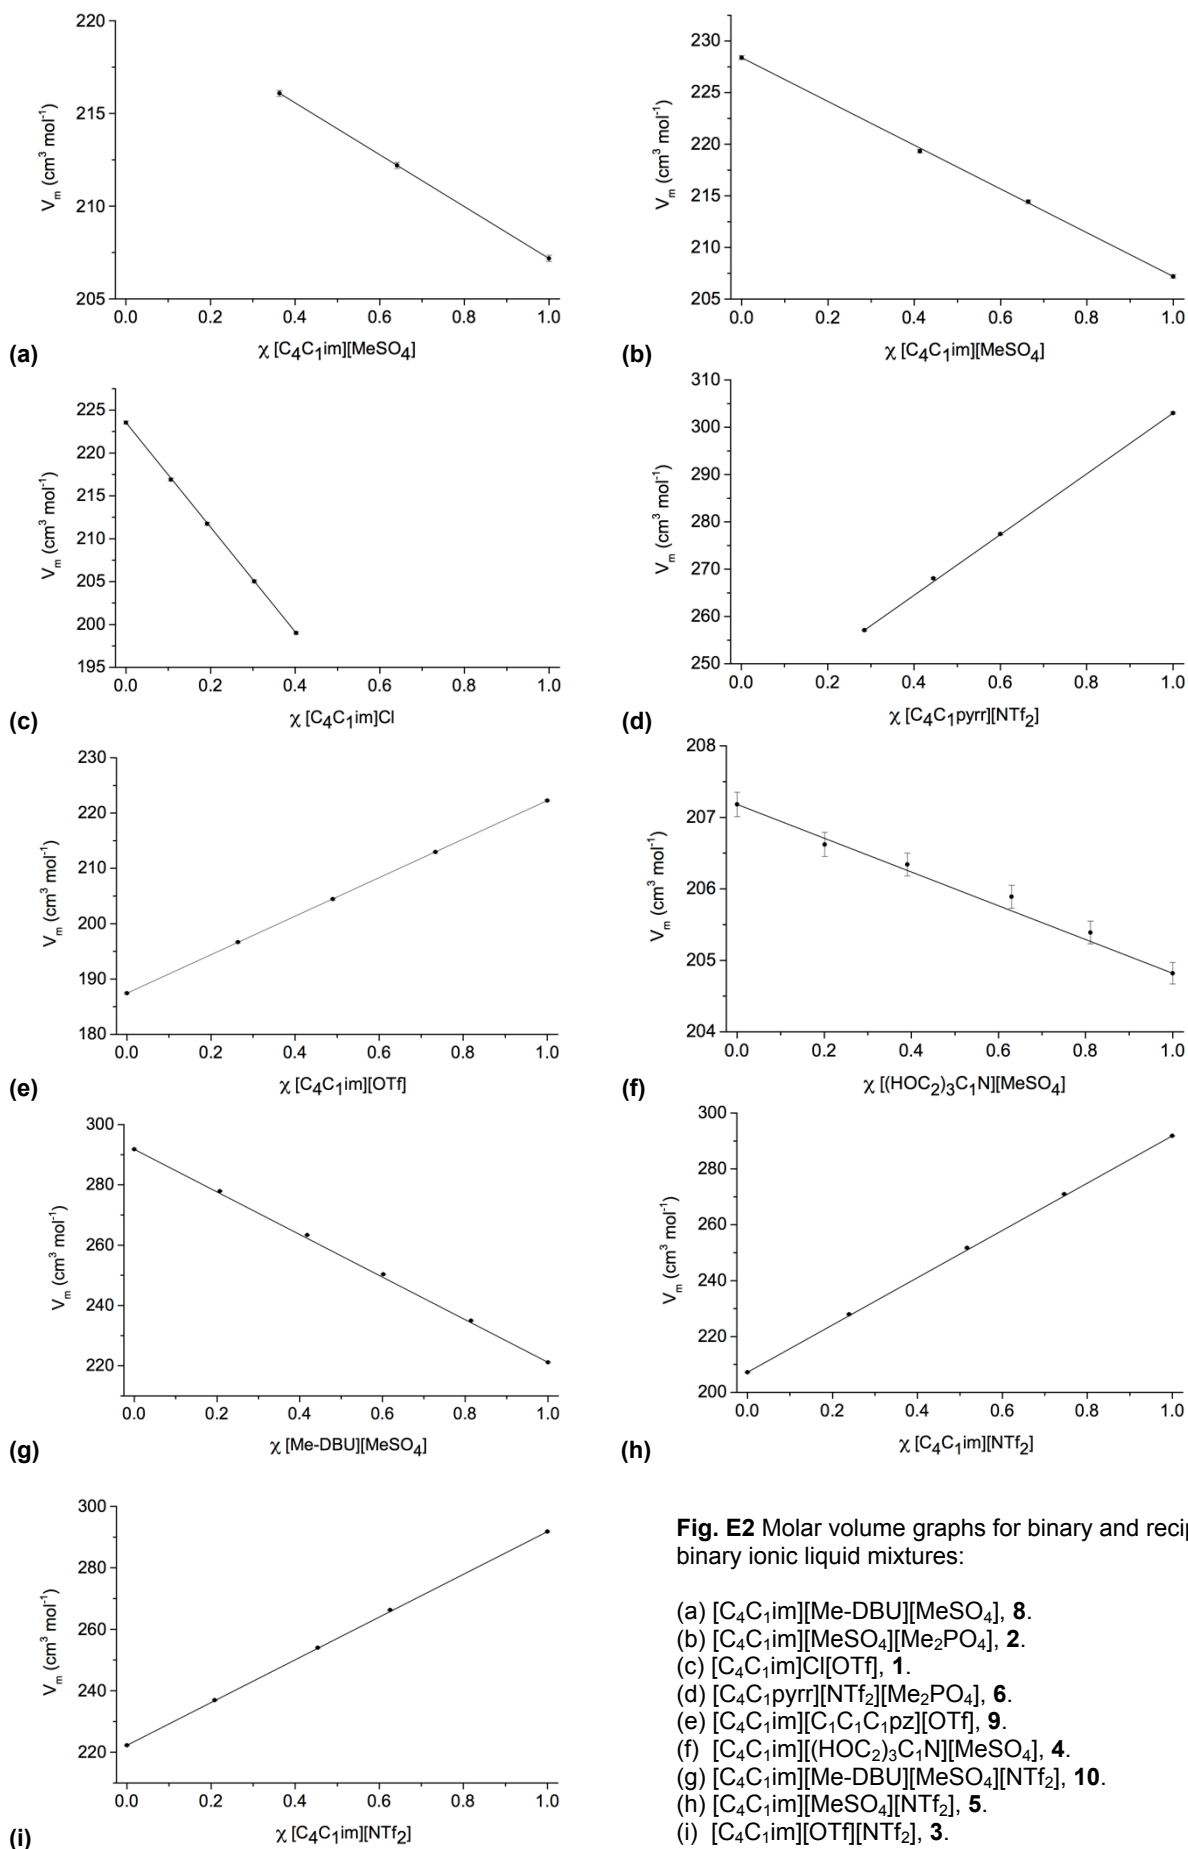

**Fig. E2** Molar volume graphs for binary and reciprocal binary ionic liquid mixtures:

- (a) [C<sub>4</sub>C<sub>1</sub>im][Me-DBU][MeSO<sub>4</sub>], **8**.
- (b) [C<sub>4</sub>C<sub>1</sub>im][MeSO<sub>4</sub>][Me<sub>2</sub>PO<sub>4</sub>], **2**.
- (c) [C<sub>4</sub>C<sub>1</sub>im]Cl[OTf], **1**.
- (d) [C<sub>4</sub>C<sub>1</sub>pyrr][NTf<sub>2</sub>][Me<sub>2</sub>PO<sub>4</sub>], **6**.
- (e) [C<sub>4</sub>C<sub>1</sub>im][C<sub>1</sub>C<sub>1</sub>C<sub>1</sub>pz][OTf], **9**.
- (f) [C<sub>4</sub>C<sub>1</sub>im][(HOC<sub>2</sub>)<sub>3</sub>C<sub>1</sub>N][MeSO<sub>4</sub>], **4**.
- (g) [C<sub>4</sub>C<sub>1</sub>im][Me-DBU][MeSO<sub>4</sub>][NTf<sub>2</sub>], **10**.
- (h) [C<sub>4</sub>C<sub>1</sub>im][MeSO<sub>4</sub>][NTf<sub>2</sub>], **5**.
- (i) [C<sub>4</sub>C<sub>1</sub>im][OTf][NTf<sub>2</sub>], **3**.

**Table E2** Molar volume (density) data for binary and reciprocal binary ionic liquid mixtures.[C<sub>4</sub>C<sub>1</sub>im]Cl[OTf], **1**.  
( $\chi$  Cl<sup>-</sup>)

| $\chi$ | <i>M</i><br>g mol <sup>-1</sup> | $\rho$<br>g cm <sup>-3</sup> | <i>V</i> <sub>m</sub><br>cm <sup>3</sup> mol <sup>-1</sup> |
|--------|---------------------------------|------------------------------|------------------------------------------------------------|
| 0      | 288.29                          | 1.2896                       | 223.55                                                     |
| 0.106  | 276.25                          | 1.2736                       | 216.90                                                     |
| 0.192  | 266.48                          | 1.2585                       | 211.74                                                     |
| 0.303  | 253.92                          | 1.2384                       | 205.03                                                     |
| 0.402  | 242.61                          | 1.2192                       | 199.00                                                     |

[C<sub>4</sub>C<sub>1</sub>im][MeSO<sub>4</sub>][Me<sub>2</sub>PO<sub>4</sub>], **2**.  
( $\chi$  [MeSO<sub>4</sub>])

| $\chi$ | <i>M</i><br>g mol <sup>-1</sup> | $\rho$<br>g cm <sup>-3</sup> | <i>V</i> <sub>m</sub><br>cm <sup>3</sup> mol <sup>-1</sup> |
|--------|---------------------------------|------------------------------|------------------------------------------------------------|
| 0      | 264.26                          | 1.1570                       | 228.40                                                     |
| 0.413  | 258.50                          | 1.1786                       | 219.33                                                     |
| 0.664  | 255.00                          | 1.1892                       | 214.43                                                     |
| 1      | 250.32                          | 1.2082                       | 207.18                                                     |

[C<sub>4</sub>C<sub>1</sub>im][OTf][NTf<sub>2</sub>], **3**.  
( $\chi$  [NTf<sub>2</sub>])

| $\chi$ | <i>M</i><br>g mol <sup>-1</sup> | $\rho$<br>g cm <sup>-3</sup> | <i>V</i> <sub>m</sub><br>cm <sup>3</sup> mol <sup>-1</sup> |
|--------|---------------------------------|------------------------------|------------------------------------------------------------|
| 0      | 288.29                          | 1.2972                       | 222.24                                                     |
| 0.209  | 315.68                          | 1.3323                       | 236.95                                                     |
| 0.454  | 347.80                          | 1.3694                       | 253.98                                                     |
| 0.626  | 370.34                          | 1.3910                       | 266.24                                                     |
| 1      | 419.36                          | 1.4371                       | 291.81                                                     |

[C<sub>4</sub>C<sub>1</sub>im][(HOC<sub>2</sub>)<sub>3</sub>C<sub>1</sub>N][MeSO<sub>4</sub>], **4**.  
( $\chi$  [(HOC<sub>2</sub>)<sub>3</sub>C<sub>1</sub>N]<sup>+</sup>)

| $\chi$ | <i>M</i><br>g mol <sup>-1</sup> | $\rho$<br>g cm <sup>-3</sup> | <i>V</i> <sub>m</sub><br>cm <sup>3</sup> mol <sup>-1</sup> |
|--------|---------------------------------|------------------------------|------------------------------------------------------------|
| 0      | 250.32                          | 1.2082                       | 207.18                                                     |
| 0.201  | 255.35                          | 1.2358                       | 206.62                                                     |
| 0.391  | 260.10                          | 1.2605                       | 206.34                                                     |
| 0.630  | 266.07                          | 1.2923                       | 205.89                                                     |
| 0.811  | 270.60                          | 1.3175                       | 205.39                                                     |
| 1      | 275.32                          | 1.3442                       | 204.82                                                     |

[C<sub>4</sub>C<sub>1</sub>im][MeSO<sub>4</sub>][NTf<sub>2</sub>], **5**.  
( $\chi$  [NTf<sub>2</sub>])

| $\chi$ | <i>M</i><br>g mol <sup>-1</sup> | $\rho$<br>g cm <sup>-3</sup> | <i>V</i> <sub>m</sub><br>cm <sup>3</sup> mol <sup>-1</sup> |
|--------|---------------------------------|------------------------------|------------------------------------------------------------|
| 0      | 250.32                          | 1.2082                       | 207.18                                                     |
| 0.239  | 290.72                          | 1.2753                       | 227.96                                                     |
| 0.517  | 337.71                          | 1.3416                       | 251.72                                                     |
| 0.746  | 376.42                          | 1.3892                       | 270.96                                                     |
| 1      | 419.36                          | 1.4371                       | 291.81                                                     |

[C<sub>4</sub>C<sub>1</sub>pyrr][NTf<sub>2</sub>][Me<sub>2</sub>PO<sub>4</sub>], **6**.  
( $\chi$  [NTf<sub>2</sub>])

| $\chi$ | <i>M</i><br>g mol <sup>-1</sup> | $\rho$<br>g cm <sup>-3</sup> | <i>V</i> <sub>m</sub><br>cm <sup>3</sup> mol <sup>-1</sup> |
|--------|---------------------------------|------------------------------|------------------------------------------------------------|
| 0      | 267.30                          | (1.1176)                     | (239.17)                                                   |
| 0.285  | 311.51                          | 1.2117                       | 257.08                                                     |
| 0.445  | 336.32                          | 1.2547                       | 268.05                                                     |
| 0.600  | 360.37                          | 1.2990                       | 277.42                                                     |
| 1      | 422.41                          | 1.3941                       | 303.00                                                     |

[C<sub>4</sub>C<sub>1</sub>im][NTf<sub>2</sub>][Me<sub>2</sub>PO<sub>4</sub>], **7**.  
( $\chi$  [NTf<sub>2</sub>])

| $\chi$ | <i>M</i><br>g mol <sup>-1</sup> | $\rho$<br>g cm <sup>-3</sup> | <i>V</i> <sub>m</sub><br>cm <sup>3</sup> mol <sup>-1</sup> |
|--------|---------------------------------|------------------------------|------------------------------------------------------------|
| 0      | 264.26                          | 1.1588                       | 228.05                                                     |
| 0.100  | 279.79                          | 1.1926                       | 234.61                                                     |
| 0.150  | 287.51                          | 1.2086                       | 237.89                                                     |
| 0.288  | 308.95                          | 1.2512                       | 246.92                                                     |
| 0.418  | 329.09                          | 1.2892                       | 255.27                                                     |
| 0.500  | 341.82                          | 1.3119                       | 260.55                                                     |
| 0.540  | 347.95                          | 1.3227                       | 263.06                                                     |
| 0.663  | 367.03                          | 1.3552                       | 270.83                                                     |
| 0.776  | 384.58                          | 1.3834                       | 277.99                                                     |
| 0.885  | 401.52                          | 1.4096                       | 284.84                                                     |
| 1      | 419.36                          | 1.4362                       | 291.99                                                     |

[C<sub>4</sub>C<sub>1</sub>im][Me-DBU][MeSO<sub>4</sub>], **8**.  
( $\chi$  [C<sub>4</sub>C<sub>1</sub>im]<sup>+</sup>)

| $\chi$ | <i>M</i><br>g mol <sup>-1</sup> | $\rho$<br>g cm <sup>-3</sup> | <i>V</i> <sub>m</sub><br>cm <sup>3</sup> mol <sup>-1</sup> |
|--------|---------------------------------|------------------------------|------------------------------------------------------------|
| 0      | 278.37                          | (1.2587)                     | (221.16)                                                   |
| 0.363  | 268.19                          | 1.2411                       | 216.09                                                     |
| 0.641  | 260.39                          | 1.2271                       | 212.20                                                     |
| 1      | 250.32                          | 1.2082                       | 207.18                                                     |

[C<sub>4</sub>C<sub>1</sub>im][C<sub>1</sub>C<sub>1</sub>C<sub>1</sub>pz][OTf], **9**.  
( $\chi$  [C<sub>4</sub>C<sub>1</sub>im]<sup>+</sup>)

| $\chi$ | <i>M</i><br>g mol <sup>-1</sup> | $\rho$<br>g cm <sup>-3</sup> | <i>V</i> <sub>m</sub><br>cm <sup>3</sup> mol <sup>-1</sup> |
|--------|---------------------------------|------------------------------|------------------------------------------------------------|
| 0      | 260.23                          | 1.3884                       | 187.43                                                     |
| 0.264  | 267.65                          | 1.3610                       | 196.66                                                     |
| 0.490  | 273.98                          | 1.3402                       | 204.44                                                     |
| 0.734  | 280.83                          | 1.3188                       | 212.94                                                     |
| 1      | 288.29                          | 1.2972                       | 222.24                                                     |

[C<sub>4</sub>C<sub>1</sub>im][Me-DBU][MeSO<sub>4</sub>][NTf<sub>2</sub>], **10**.  
( $\chi$  [Me-DBU][MeSO<sub>4</sub>])

| $\chi$ | <i>M</i><br>g mol <sup>-1</sup> | $\rho$<br>g cm <sup>-3</sup> | <i>V</i> <sub>m</sub><br>cm <sup>3</sup> mol <sup>-1</sup> |
|--------|---------------------------------|------------------------------|------------------------------------------------------------|
| 0      | 419.36                          | 1.4371                       | 291.81                                                     |
| 0.207  | 390.11                          | 1.4038                       | 277.90                                                     |
| 0.418  | 360.42                          | 1.3686                       | 263.35                                                     |
| 0.602  | 334.52                          | 1.3363                       | 250.33                                                     |
| 0.814  | 304.59                          | 1.2963                       | 234.97                                                     |
| 1      | 278.37                          | (1.2587)                     | (221.16)                                                   |

[C<sub>4</sub>C<sub>1</sub>im][C<sub>4</sub>C<sub>1</sub>pyrr][OTf][NTf<sub>2</sub>], **11**.  
( $\chi$  [C<sub>4</sub>C<sub>1</sub>im][OTf])

| $\chi$ | <i>M</i><br>g mol <sup>-1</sup> | $\rho$<br>g cm <sup>-3</sup> | <i>V</i> <sub>m</sub><br>cm <sup>3</sup> mol <sup>-1</sup> |
|--------|---------------------------------|------------------------------|------------------------------------------------------------|
| 0      | 422.41                          | 1.3941                       | 303.00                                                     |
| 0.233  | 391.16                          | 1.3761                       | 284.25                                                     |
| 0.377  | 371.85                          | 1.3643                       | 272.55                                                     |
| 0.602  | 341.67                          | 1.3425                       | 254.50                                                     |
| 0.787  | 316.86                          | 1.3237                       | 239.37                                                     |
| 0.881  | 304.25                          | 1.3118                       | 231.93                                                     |
| 1      | 288.29                          | 1.2972                       | 222.24                                                     |



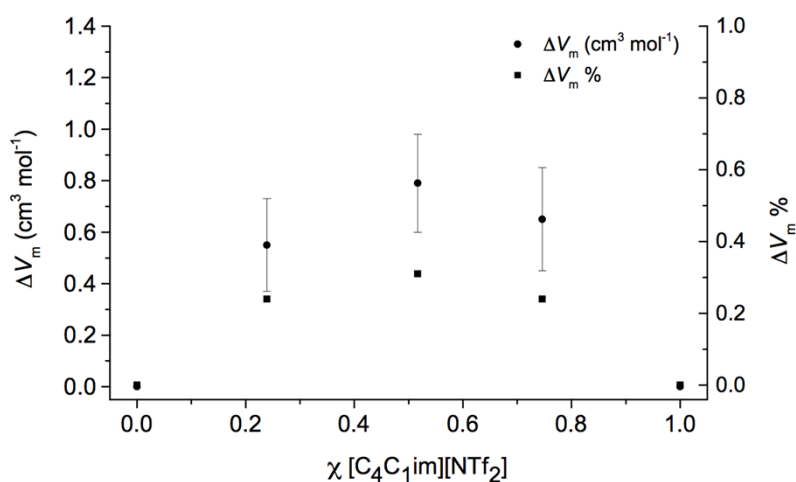

**Fig. E3** Excess molar volume graph for  $[\text{C}_4\text{C}_1\text{im}][\text{MeSO}_4][\text{NTf}_2]$ , **5**.

**Table E3** Excess molar volume data for  $[\text{C}_4\text{C}_1\text{im}][\text{MeSO}_4][\text{NTf}_2]$ , **5**,  $[\text{C}_4\text{C}_1\text{im}][\text{NTf}_2][\text{Me}_2\text{PO}_4]$ , **7**, and  $[\text{C}_4\text{C}_1\text{im}][\text{Me-DBU}][\text{MeSO}_4][\text{NTf}_2]$ , **10**.

$[\text{C}_4\text{C}_1\text{im}][\text{MeSO}_4][\text{NTf}_2]$ , **5**

| $\chi [\text{NTf}_2]^-$ | $V_m$<br>( $\text{cm}^3 \text{mol}^{-1}$ ) | $\Delta V_m$<br>( $\text{cm}^3 \text{mol}^{-1}$ ) | Error<br>( $\text{cm}^3 \text{mol}^{-1}$ ) | $\Delta V_m$<br>% |
|-------------------------|--------------------------------------------|---------------------------------------------------|--------------------------------------------|-------------------|
| 0                       | 207.18                                     | 0                                                 | 0                                          | 0                 |
| 0.239                   | 227.96                                     | 0.55                                              | 0.18                                       | 0.24              |
| 0.517                   | 251.72                                     | 0.79                                              | 0.19                                       | 0.31              |
| 0.746                   | 270.96                                     | 0.65                                              | 0.20                                       | 0.24              |
| 1                       | 291.81                                     | 0                                                 | 0                                          | 0                 |

$[\text{C}_4\text{C}_1\text{im}][\text{NTf}_2][\text{Me}_2\text{PO}_4]$ , **7**

| $\chi [\text{NTf}_2]^-$ | $V_m$<br>( $\text{cm}^3 \text{mol}^{-1}$ ) | $\Delta V_m$<br>( $\text{cm}^3 \text{mol}^{-1}$ ) | Error<br>( $\text{cm}^3 \text{mol}^{-1}$ ) | $\Delta V_m$<br>% |
|-------------------------|--------------------------------------------|---------------------------------------------------|--------------------------------------------|-------------------|
| 0                       | 228.05                                     | 0                                                 | 0                                          | 0                 |
| 0.100                   | 234.61                                     | 0.15                                              | 0.20                                       | 0.07              |
| 0.150                   | 237.89                                     | 0.25                                              | 0.20                                       | 0.11              |
| 0.288                   | 246.92                                     | 0.45                                              | 0.20                                       | 0.18              |
| 0.418                   | 255.27                                     | 0.49                                              | 0.20                                       | 0.19              |
| 0.500                   | 260.55                                     | 0.53                                              | 0.20                                       | 0.20              |
| 0.540                   | 263.06                                     | 0.51                                              | 0.20                                       | 0.19              |
| 0.663                   | 270.83                                     | 0.41                                              | 0.20                                       | 0.15              |
| 0.776                   | 277.99                                     | 0.34                                              | 0.20                                       | 0.12              |
| 0.885                   | 284.84                                     | 0.20                                              | 0.20                                       | 0.07              |
| 1                       | 291.99                                     | 0                                                 | 0                                          | 0                 |

$[\text{C}_4\text{C}_1\text{im}][\text{Me-DBU}][\text{MeSO}_4][\text{NTf}_2]$ , **10**

| $\chi [\text{Me-DBU}][\text{MeSO}_4]$ | $V_m$<br>( $\text{cm}^3 \text{mol}^{-1}$ ) | $\Delta V_m$<br>( $\text{cm}^3 \text{mol}^{-1}$ ) | Error<br>( $\text{cm}^3 \text{mol}^{-1}$ ) | $\Delta V_m$<br>% |
|---------------------------------------|--------------------------------------------|---------------------------------------------------|--------------------------------------------|-------------------|
| 0                                     | 291.81                                     | 0                                                 | 0                                          | 0                 |
| 0.207                                 | 277.90                                     | 0.71                                              | 0.20                                       | 0.26              |
| 0.418                                 | 263.35                                     | 1.07                                              | 0.19                                       | 0.41              |
| 0.602                                 | 250.33                                     | 1.05                                              | 0.19                                       | 0.42              |
| 0.814                                 | 234.97                                     | 0.67                                              | 0.18                                       | 0.29              |
| 1                                     | 221.16                                     | 0                                                 | 0                                          | 0                 |

#### 4. Phase behaviour / glass transition temperatures of ionic liquid mixtures

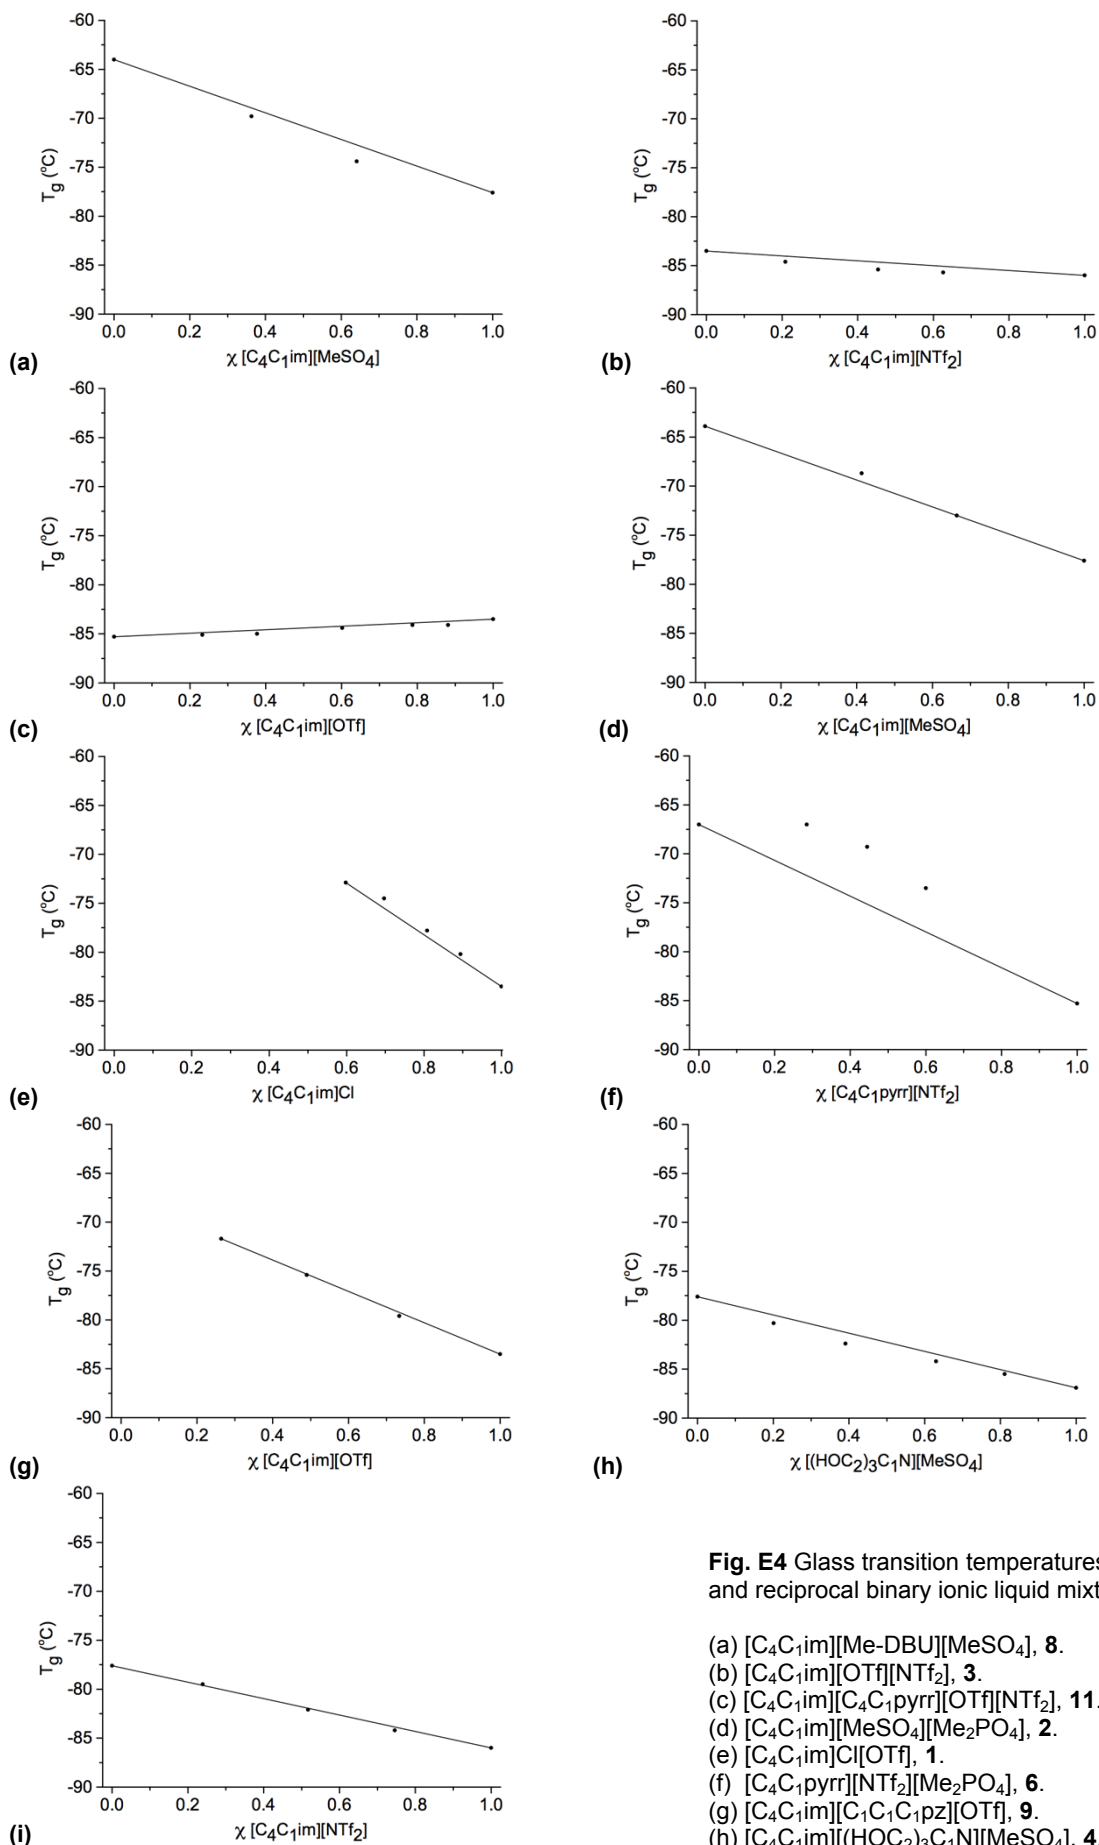

**Fig. E4** Glass transition temperatures ( $T_g$ ) for binary and reciprocal binary ionic liquid mixtures:

- (a) [C<sub>4</sub>C<sub>1</sub>im][Me-DBU][MeSO<sub>4</sub>], **8**.
- (b) [C<sub>4</sub>C<sub>1</sub>im][OTf][NTf<sub>2</sub>], **3**.
- (c) [C<sub>4</sub>C<sub>1</sub>im][C<sub>4</sub>C<sub>1</sub>pyrr][OTf][NTf<sub>2</sub>], **11**.
- (d) [C<sub>4</sub>C<sub>1</sub>im][MeSO<sub>4</sub>][Me<sub>2</sub>PO<sub>4</sub>], **2**.
- (e) [C<sub>4</sub>C<sub>1</sub>im]Cl[OTf], **1**.
- (f) [C<sub>4</sub>C<sub>1</sub>pyrr][NTf<sub>2</sub>][Me<sub>2</sub>PO<sub>4</sub>], **6**.
- (g) [C<sub>4</sub>C<sub>1</sub>im][C<sub>1</sub>C<sub>1</sub>C<sub>1</sub>pz][OTf], **9**.
- (h) [C<sub>4</sub>C<sub>1</sub>im][(HOC<sub>2</sub>)<sub>3</sub>C<sub>1</sub>N][MeSO<sub>4</sub>], **4**.
- (i) [C<sub>4</sub>C<sub>1</sub>im][MeSO<sub>4</sub>][NTf<sub>2</sub>], **5**.

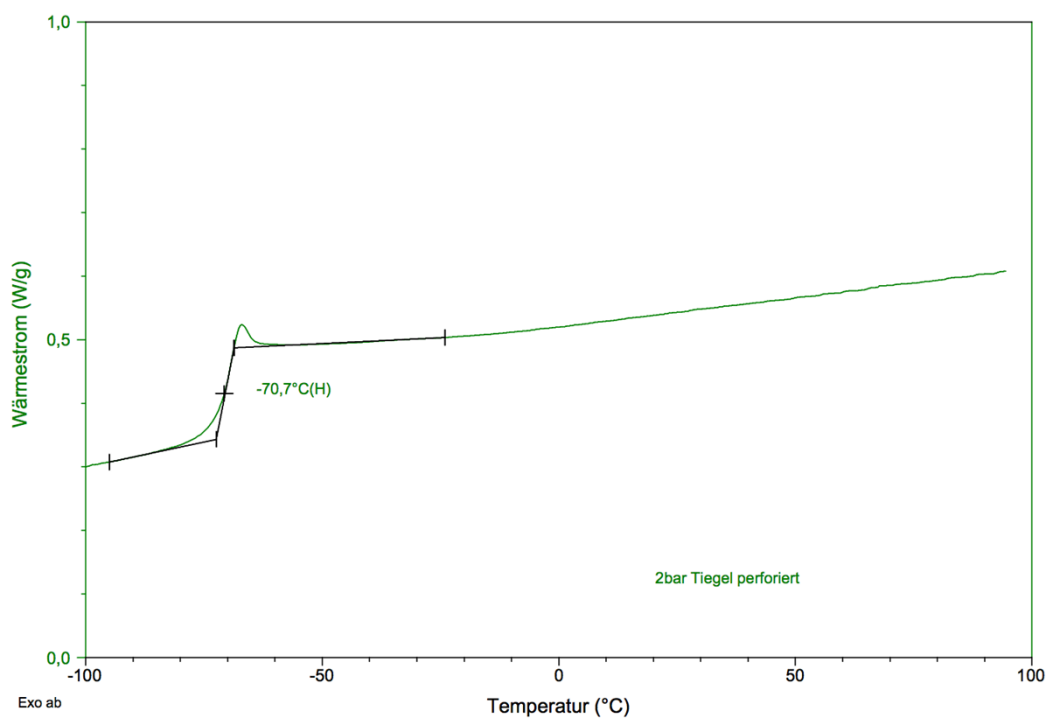

(j)

**Fig. E4 continued** Example DSC trace for the ionic liquid mixture  $[\text{C}_4\text{C}_1\text{im}][\text{NTf}_2]_{0.5}[\text{Me}_2\text{PO}_4]_{0.5}$ , **7**. The glass transition temperature values,  $T_g$ , are calculated by manual peak analysis, therefore precise errors are difficult to ascertain. An error value of  $\pm 0.5\text{ }^\circ\text{C}$  is tentatively assigned for all  $T_g$  values.

**Table E4** Glass transition temperature ( $T_g$ ) data for binary and reciprocal binary ionic liquid mixtures.

| <b>[C<sub>4</sub>C<sub>1</sub>im]Cl[OTf], 1</b> |               | <b>[C<sub>4</sub>C<sub>1</sub>im][MeSO<sub>4</sub>][Me<sub>2</sub>PO<sub>4</sub>], 2</b> |               | <b>[C<sub>4</sub>C<sub>1</sub>im][OTf][NTf<sub>2</sub>], 3</b> |               |
|-------------------------------------------------|---------------|------------------------------------------------------------------------------------------|---------------|----------------------------------------------------------------|---------------|
| $\chi$ Cl <sup>-</sup>                          | $T_g$<br>(°C) | $\chi$ [Me <sub>2</sub> PO <sub>4</sub> ] <sup>-</sup>                                   | $T_g$<br>(°C) | $\chi$ [NTf <sub>2</sub> ] <sup>-</sup>                        | $T_g$<br>(°C) |
| 0                                               | -83.5         | 0                                                                                        | -77.6         | 0                                                              | -83.5         |
| 0.106                                           | -80.2         | 0.336                                                                                    | -73.0         | 0.209                                                          | -84.6         |
| 0.192                                           | -77.8         | 0.587                                                                                    | -68.7         | 0.454                                                          | -85.4         |
| 0.303                                           | -74.5         | 1                                                                                        | -63.9         | 0.626                                                          | -85.7         |
| 0.402                                           | -72.9         |                                                                                          |               | 1                                                              | -86.0         |

  

| <b>[C<sub>4</sub>C<sub>1</sub>im][(HOC<sub>2</sub>)<sub>3</sub>C<sub>1</sub>N][MeSO<sub>4</sub>], 4</b> |               | <b>[C<sub>4</sub>C<sub>1</sub>im][MeSO<sub>4</sub>][NTf<sub>2</sub>], 5</b> |               | <b>[C<sub>4</sub>C<sub>1</sub>pyrr][NTf<sub>2</sub>][Me<sub>2</sub>PO<sub>4</sub>], 6</b> |               |
|---------------------------------------------------------------------------------------------------------|---------------|-----------------------------------------------------------------------------|---------------|-------------------------------------------------------------------------------------------|---------------|
| $\chi$ [(HOC <sub>2</sub> ) <sub>3</sub> C <sub>1</sub> N] <sup>+</sup>                                 | $T_g$<br>(°C) | $\chi$ [NTf <sub>2</sub> ] <sup>-</sup>                                     | $T_g$<br>(°C) | $\chi$ [NTf <sub>2</sub> ] <sup>-</sup>                                                   | $T_g$<br>(°C) |
| 0                                                                                                       | -77.6         | 0                                                                           | -77.6         | 0                                                                                         | -67.0         |
| 0.201                                                                                                   | -80.3         | 0.239                                                                       | -79.5         | 0.285                                                                                     | -67.0         |
| 0.391                                                                                                   | -82.4         | 0.517                                                                       | -82.1         | 0.445                                                                                     | -69.3         |
| 0.630                                                                                                   | -84.2         | 0.746                                                                       | -84.2         | 0.600                                                                                     | -73.5         |
| 0.811                                                                                                   | -85.5         | 1                                                                           | -86.0         | 1                                                                                         | -85.3         |
| 1                                                                                                       | -86.9         |                                                                             |               |                                                                                           |               |

  

| <b>[C<sub>4</sub>C<sub>1</sub>im][NTf<sub>2</sub>][Me<sub>2</sub>PO<sub>4</sub>], 7</b> |               | <b>[C<sub>4</sub>C<sub>1</sub>im][Me-DBU][MeSO<sub>4</sub>], 8</b> |               | <b>[C<sub>4</sub>C<sub>1</sub>im][C<sub>1</sub>C<sub>1</sub>C<sub>1</sub>pz][OTf], 9</b> |               |
|-----------------------------------------------------------------------------------------|---------------|--------------------------------------------------------------------|---------------|------------------------------------------------------------------------------------------|---------------|
| $\chi$ [NTf <sub>2</sub> ] <sup>-</sup>                                                 | $T_g$<br>(°C) | $\chi$ [Me-DBU] <sup>+</sup>                                       | $T_g$<br>(°C) | $\chi$ [C <sub>1</sub> C <sub>1</sub> C <sub>1</sub> pz] <sup>+</sup>                    | $T_g$<br>(°C) |
| 0                                                                                       | -64.7         | 0                                                                  | -77.6         | 0                                                                                        | -83.5         |
| 0.150                                                                                   | -65.7         | 0.359                                                              | -74.4         | 0.266                                                                                    | -79.6         |
| 0.271                                                                                   | -67.1         | 0.637                                                              | -69.8         | 0.510                                                                                    | -75.4         |
| 0.387                                                                                   | -67.9         | 1                                                                  | -64.0         | 0.736                                                                                    | -71.7         |
| 0.500                                                                                   | -70.7         |                                                                    |               | 1                                                                                        | /             |
| 0.690                                                                                   | -77.5         |                                                                    |               |                                                                                          |               |
| 0.838                                                                                   | -81.6         |                                                                    |               |                                                                                          |               |
| 1                                                                                       | -86.0         |                                                                    |               |                                                                                          |               |

  

| <b>[C<sub>4</sub>C<sub>1</sub>im][Me-DBU][MeSO<sub>4</sub>][NTf<sub>2</sub>], 10</b> |               | <b>[C<sub>4</sub>C<sub>1</sub>im][C<sub>4</sub>C<sub>1</sub>pyrr][OTf][NTf<sub>2</sub>], 11</b> |               |
|--------------------------------------------------------------------------------------|---------------|-------------------------------------------------------------------------------------------------|---------------|
| $\chi$ [Me-DBU][MeSO <sub>4</sub> ]                                                  | $T_g$<br>(°C) | $\chi$ [C <sub>4</sub> C <sub>1</sub> pyrr][NTf <sub>2</sub> ]                                  | $T_g$<br>(°C) |
| 0                                                                                    | -86.0         | 0                                                                                               | -83.5         |
| 0.207                                                                                | -82.4         | 0.119                                                                                           | -84.1         |
| 0.418                                                                                | -77.8         | 0.213                                                                                           | -84.1         |
| 0.602                                                                                | -73.4         | 0.398                                                                                           | -84.4         |
| 0.814                                                                                | -68.4         | 0.623                                                                                           | -85.0         |
| 1                                                                                    | -64.0         | 0.767                                                                                           | -85.1         |
|                                                                                      |               | 1                                                                                               | -85.3         |

## 5. Viscosities of ionic liquid mixtures

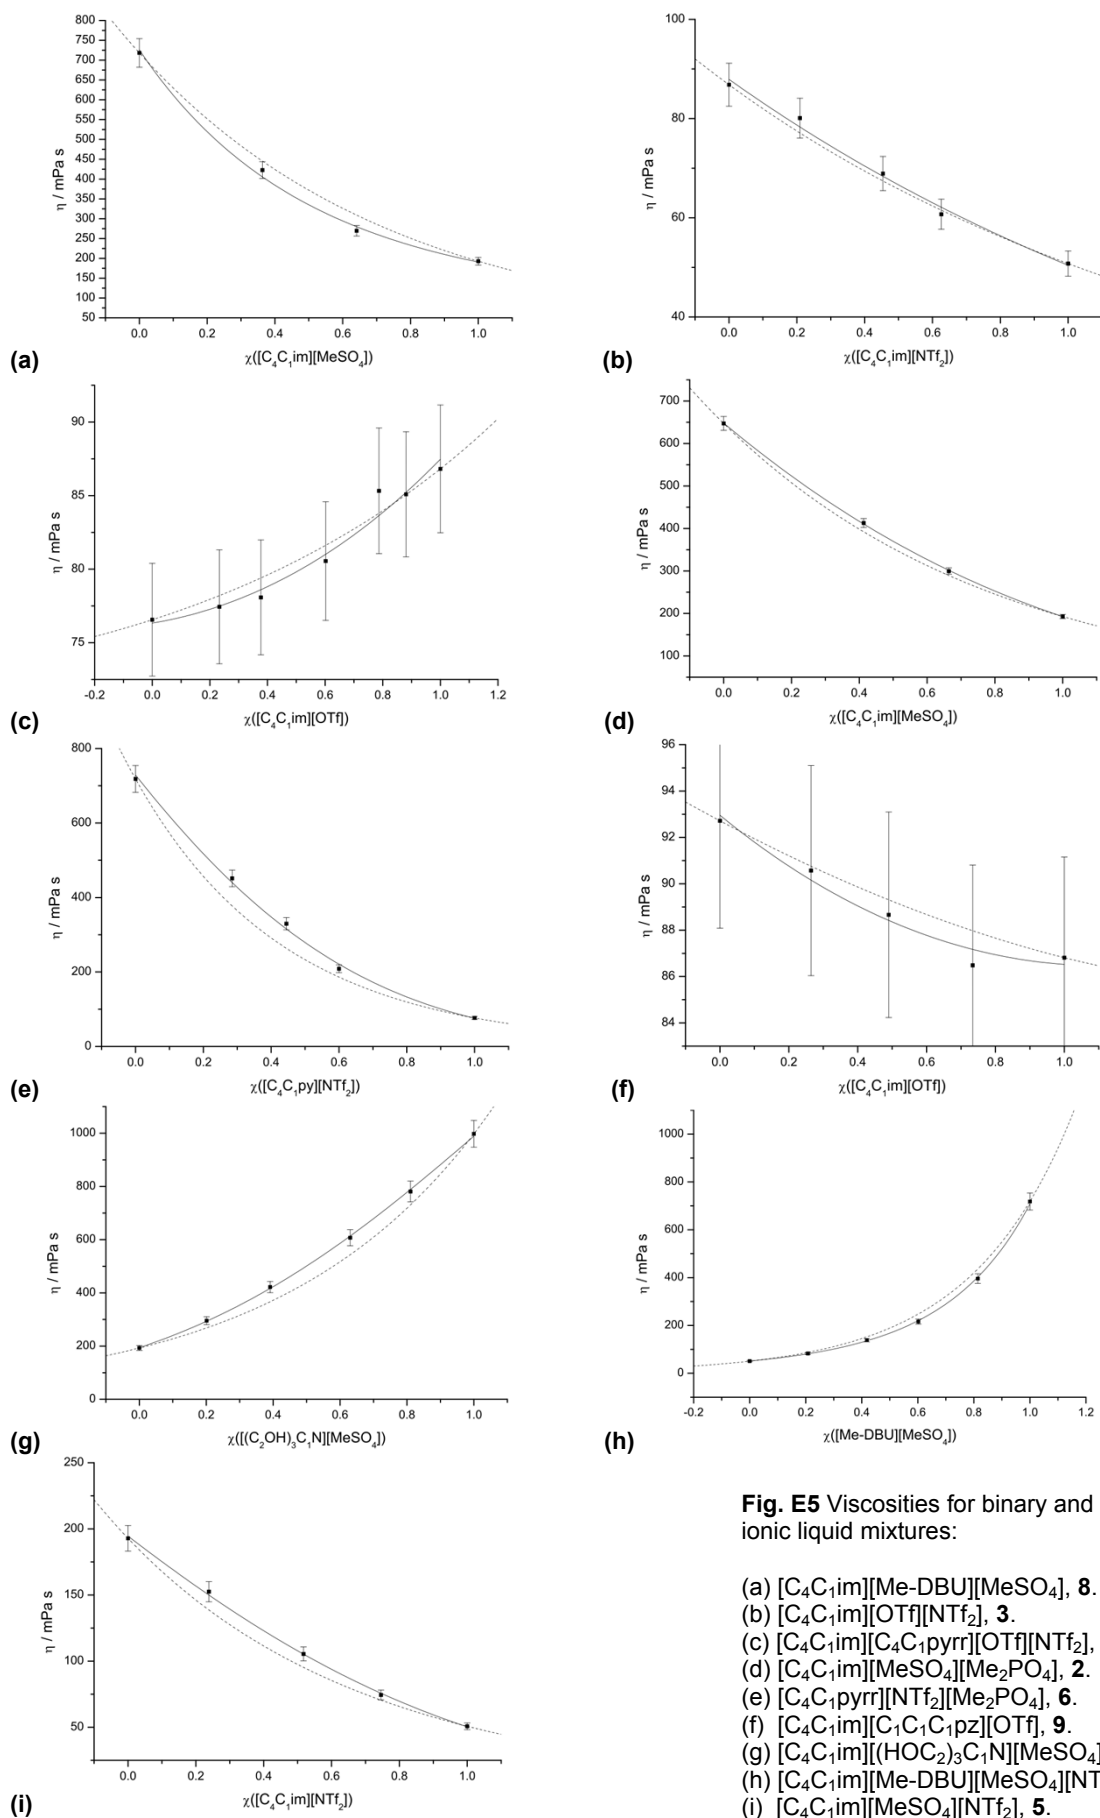

**Fig. E5** Viscosities for binary and reciprocal binary ionic liquid mixtures:

- (a) [C<sub>4</sub>C<sub>1</sub>im][Me-DBU][MeSO<sub>4</sub>], **8**.
- (b) [C<sub>4</sub>C<sub>1</sub>im][OTf][NTf<sub>2</sub>], **3**.
- (c) [C<sub>4</sub>C<sub>1</sub>im][C<sub>4</sub>C<sub>1</sub>pyrr][OTf][NTf<sub>2</sub>], **11**.
- (d) [C<sub>4</sub>C<sub>1</sub>im][MeSO<sub>4</sub>][Me<sub>2</sub>PO<sub>4</sub>], **2**.
- (e) [C<sub>4</sub>C<sub>1</sub>pyrr][NTf<sub>2</sub>][Me<sub>2</sub>PO<sub>4</sub>], **6**.
- (f) [C<sub>4</sub>C<sub>1</sub>im][C<sub>1</sub>C<sub>1</sub>C<sub>1</sub>pz][OTf], **9**.
- (g) [C<sub>4</sub>C<sub>1</sub>im][(HO<sub>2</sub>)<sub>3</sub>C<sub>1</sub>N][MeSO<sub>4</sub>], **4**.
- (h) [C<sub>4</sub>C<sub>1</sub>im][Me-DBU][MeSO<sub>4</sub>][NTf<sub>2</sub>], **10**.
- (i) [C<sub>4</sub>C<sub>1</sub>im][MeSO<sub>4</sub>][NTf<sub>2</sub>], **5**.

Graphs were constructed using a logarithmic fitting, in the Origin Pro v. 8.5 package of programmes.

## 6. Conductivities of ionic liquid mixtures

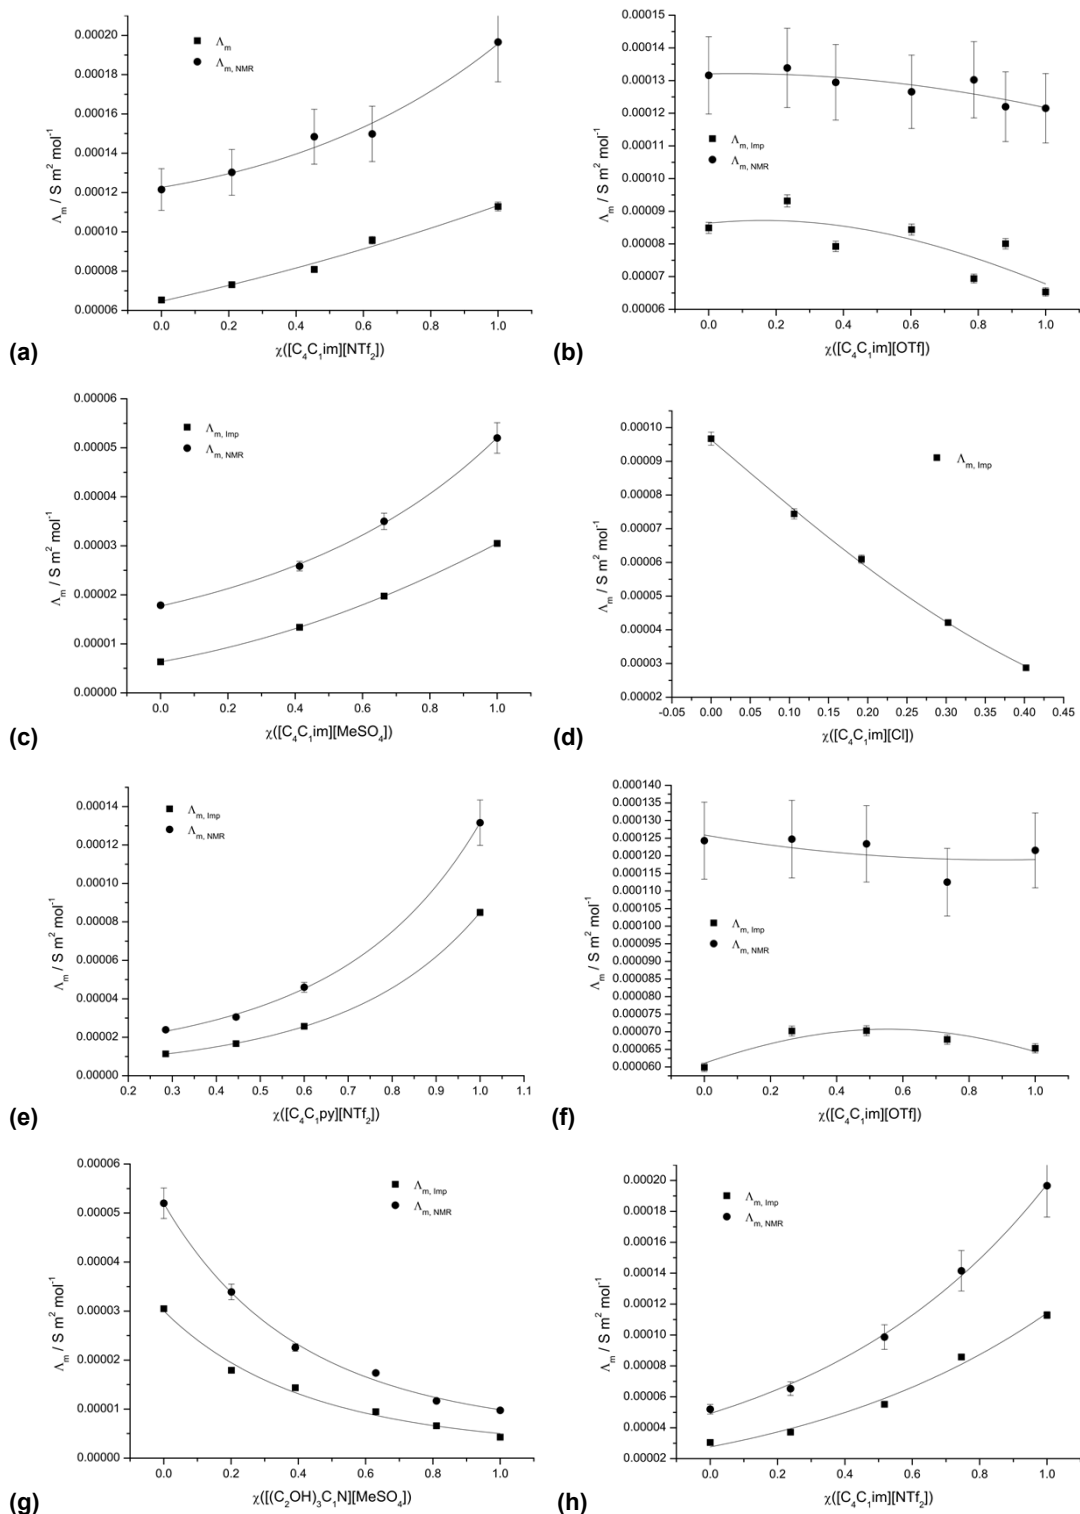

**Fig. E6** Conductivities for binary and reciprocal binary ionic liquid mixtures:

- (a)  $[\text{C}_4\text{C}_1\text{im}][\text{OTf}][\text{NTf}_2]$ , **3**.
- (b)  $[\text{C}_4\text{C}_1\text{im}][\text{C}_4\text{C}_1\text{pyrr}][\text{OTf}][\text{NTf}_2]$ , **11**.
- (c)  $[\text{C}_4\text{C}_1\text{im}][\text{MeSO}_4][\text{Me}_2\text{PO}_4]$ , **2**.
- (d)  $[\text{C}_4\text{C}_1\text{im}][\text{Cl}][\text{OTf}]$ , **1**.
- (e)  $[\text{C}_4\text{C}_1\text{pyrr}][\text{NTf}_2][\text{Me}_2\text{PO}_4]$ , **6**.
- (f)  $[\text{C}_4\text{C}_1\text{im}][\text{C}_1\text{C}_1\text{pz}][\text{OTf}]$ , **9**.
- (g)  $[\text{C}_4\text{C}_1\text{im}][(\text{HO}_2)_3\text{C}_1\text{N}][\text{MeSO}_4]$ , **4**.
- (h)  $[\text{C}_4\text{C}_1\text{im}][\text{MeSO}_4][\text{NTf}_2]$ , **5**.

Graphs were constructed using a logarithmic fitting, in the Origin Pro v. 8.5 package of programmes.

## 7. Walden relationship of viscosity and conductivity for ionic liquid mixtures

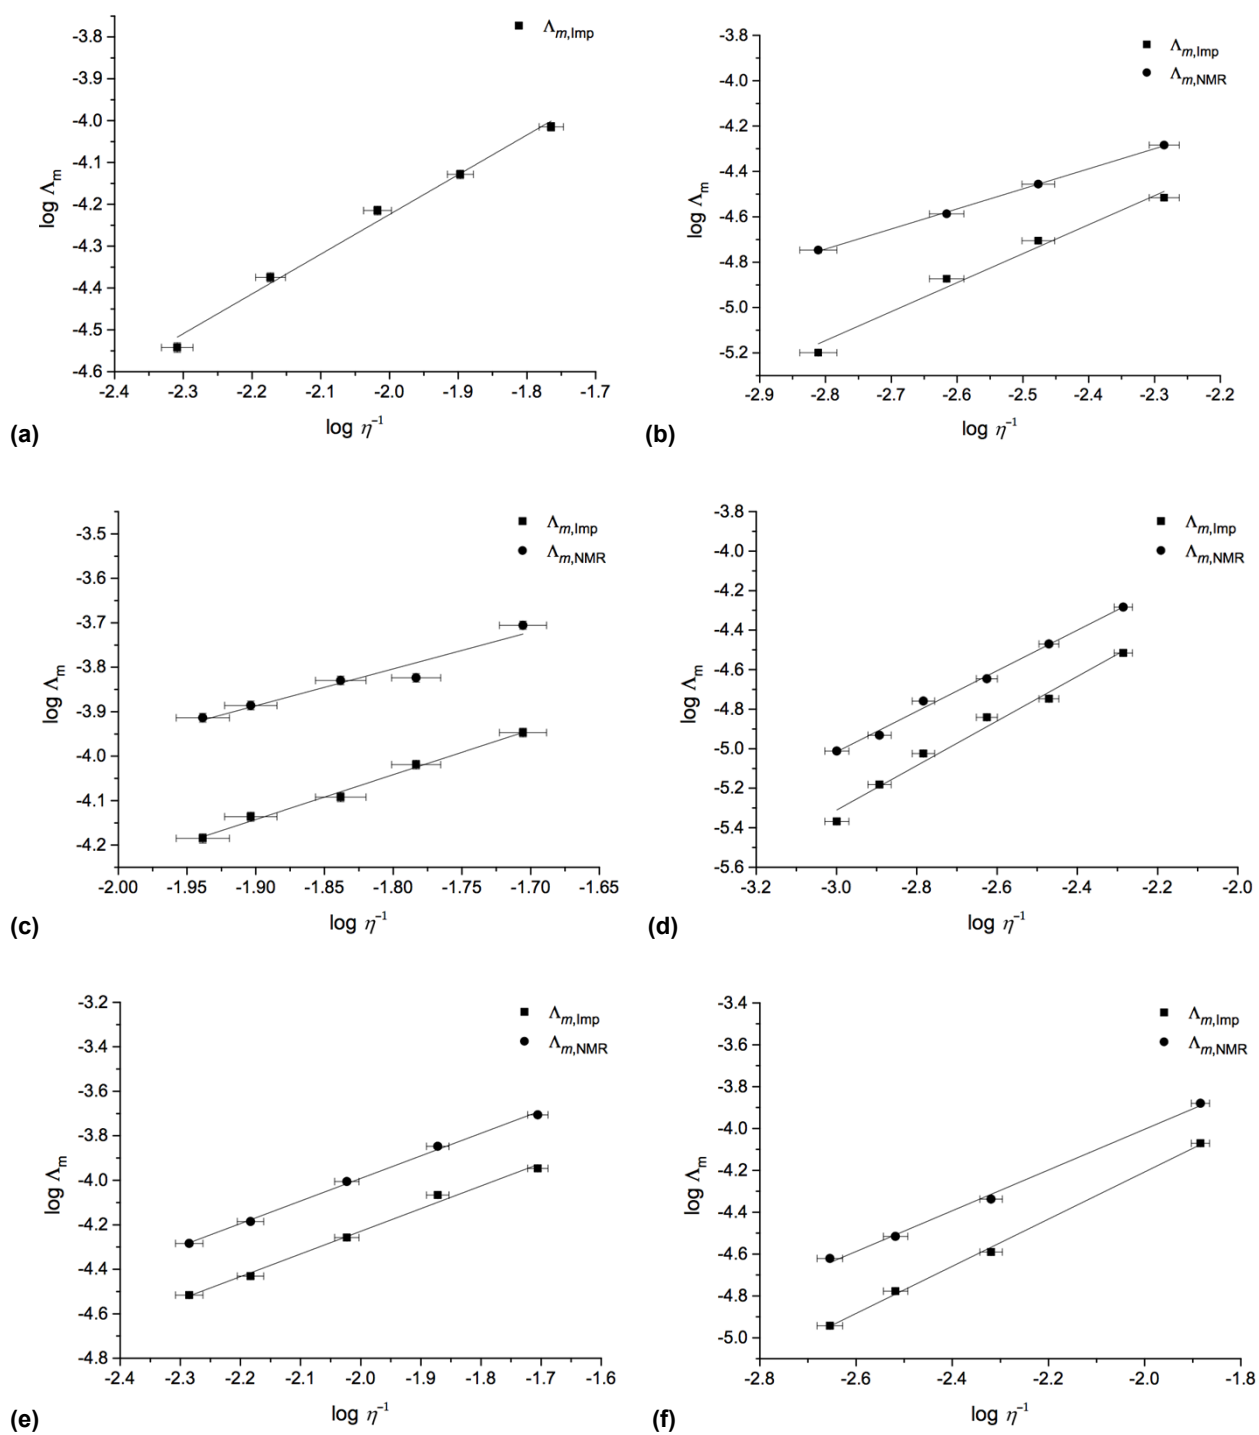

**Fig. E7** Walden plots plotting log inverse viscosity ( $\log (\eta^{-1}$ ,  $mPa^{-1} s^{-1}$ ), and the log conductivity,  $\log (\Lambda_m, Sm^2 mol^{-1})$ , for ionic liquid mixture series':

- (a)  $[C_4C_1im]Cl[OTf]$ , 1.
- (b)  $[C_4C_1im][MeSO_4][Me_2PO_4]$ , 2.
- (c)  $[C_4C_1im][OTf][NTf_2]$ , 3.
- (d)  $[C_4C_1im][(HOC_2)_3C_1N][MeSO_4]$ , 4.
- (e)  $[C_4C_1im][MeSO_4][NTf_2]$ , 5.
- (f)  $[C_4C_1pyrr][NTf_2][Me_2PO_4]$ , 6.

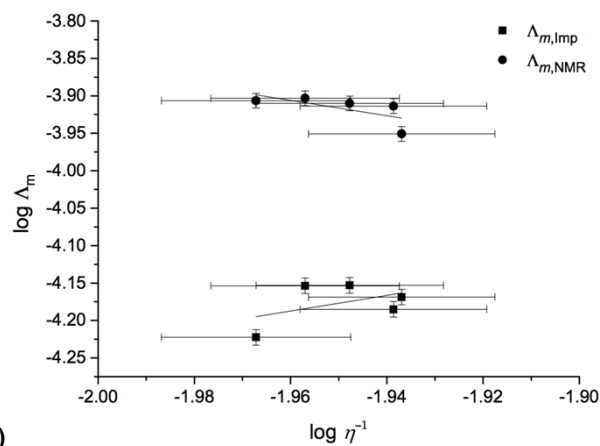

(g)

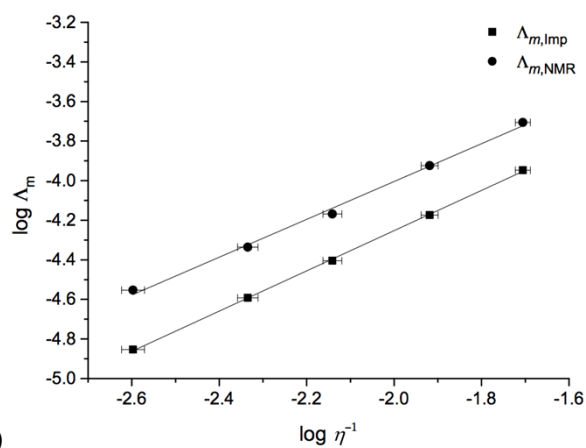

(h)

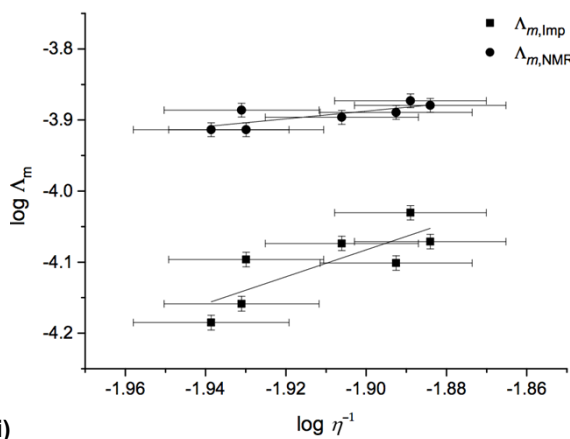

(i)

**Fig. E7 continued** Walden plots plotting log inverse viscosity ( $\log (\eta^{-1}, \text{mPa}^{-1} \text{s}^{-1})$ ), and the log conductivity,  $\log (\Lambda_m, \text{Sm}^2 \text{mol}^{-1})$ , for ionic liquid mixture series':

(g)  $[\text{C}_4\text{C}_1\text{im}][\text{C}_1\text{C}_1\text{C}_1\text{pz}][\text{OTf}]$ , **9**.

(h)  $[\text{C}_4\text{C}_1\text{im}][\text{Me-DBU}][\text{MeSO}_4][\text{NTf}_2]$ , **10**

(i)  $[\text{C}_4\text{C}_1\text{im}][\text{C}_4\text{C}_1\text{pyrr}][\text{OTf}][\text{NTf}_2]$ , **11**.



**Table E5** Viscosity and conductivity data for binary and reciprocal binary ionic liquid mixtures.**[C<sub>4</sub>C<sub>1</sub>im][Cl][OTf], 1** ( $\chi$  Cl<sup>-</sup>)

| $\chi$   | $\eta$<br>mPa s | $\Lambda_{m,Imp}$<br>Sm <sup>2</sup> /mol | $\Lambda_{m,NMR}$<br>Sm <sup>2</sup> /mol |
|----------|-----------------|-------------------------------------------|-------------------------------------------|
| 0        | 58.16           | 9.67E-05                                  | N/A                                       |
| 0.106    | 78.87           | 7.44E-05                                  | N/A                                       |
| 0.192    | 104.10          | 6.10E-05                                  | N/A                                       |
| 0.303    | 149.00          | 4.22E-05                                  | N/A                                       |
| 0.402    | 203.67          | 2.87E-05                                  | N/A                                       |
| <i>f</i> | -0.4866         | 2.58834                                   |                                           |

**[C<sub>4</sub>C<sub>1</sub>im][MeSO<sub>4</sub>][Me<sub>2</sub>PO<sub>4</sub>], 2** ( $\chi$  [MeSO<sub>4</sub>]<sup>-</sup>)

| $\chi$   | $\eta$<br>mPa s | $\Lambda_{m,Imp}$<br>Sm <sup>2</sup> /mol | $\Lambda_{m,NMR}$<br>Sm <sup>2</sup> /mol |
|----------|-----------------|-------------------------------------------|-------------------------------------------|
| 1        | 192.85          | 3.05E-05                                  | 5.20E-05                                  |
| 0        | 647.30          | 6.33E-06                                  | 1.79E-05                                  |
| 0.413    | 412.97          | 1.34E-05                                  | 2.59E-05                                  |
| 0.664    | 299.63          | 1.97E-05                                  | 3.50E-05                                  |
| <i>f</i> | 0.197994        | 0.4516                                    | -0.22123                                  |

**[C<sub>4</sub>C<sub>1</sub>im][OTf][NTf<sub>2</sub>], 3** ( $\chi$  [NTf<sub>2</sub>]<sup>-</sup>)

| $\chi$   | $\eta$<br>mPa s | $\Lambda_{m,Imp}$<br>Sm <sup>2</sup> /mol | $\Lambda_{m,NMR}$<br>Sm <sup>2</sup> /mol |
|----------|-----------------|-------------------------------------------|-------------------------------------------|
| 0        | 86.82           | 6.53E-05                                  | 1.22E-04                                  |
| 1        | 50.76           | 1.13E-04                                  | 1.97E-04                                  |
| 0.454    | 68.90           | 8.09E-05                                  | 1.48E-04                                  |
| 0.209    | 80.09           | 7.31E-05                                  | 1.30E-04                                  |
| 0.626    | 60.71           | 9.57E-05                                  | 1.50E-04                                  |
| <i>f</i> | 0.003694        | 0.03437                                   | -0.25742                                  |

**[C<sub>4</sub>C<sub>1</sub>im][(HOC<sub>2</sub>)<sub>3</sub>C<sub>1</sub>N][MeSO<sub>4</sub>], 4** ( $\chi$  [(HOC<sub>2</sub>)<sub>3</sub>C<sub>1</sub>N]<sup>+</sup>)

| $\chi$   | $\eta$<br>mPa s | $\Lambda_{m,Imp}$<br>Sm <sup>2</sup> /mol | $\Lambda_{m,NMR}$<br>Sm <sup>2</sup> /mol |
|----------|-----------------|-------------------------------------------|-------------------------------------------|
| 0        | 192.85          | 3.05E-05                                  | 5.20E-05                                  |
| 1        | 997.77          | 4.28E-06                                  | 9.74E-06                                  |
| 0.391    | 422.05          | 1.44E-05                                  | 2.26E-05                                  |
| 0.630    | 607.35          | 9.46E-06                                  | 1.74E-05                                  |
| 0.811    | 781.10          | 6.59E-06                                  | 1.17E-05                                  |
| 0.201    | 295.55          | 1.79E-05                                  | 3.39E-05                                  |
| <i>f</i> | 0.575614        | -0.49877                                  | -0.65208                                  |

**[C<sub>4</sub>C<sub>1</sub>im][MeSO<sub>4</sub>][NTf<sub>2</sub>], 5** ( $\chi$  [NTf<sub>2</sub>]<sup>-</sup>)

| $\chi$   | $\eta$<br>mPa s | $\Lambda_{m,Imp}$<br>Sm <sup>2</sup> /mol | $\Lambda_{m,NMR}$<br>Sm <sup>2</sup> /mol |
|----------|-----------------|-------------------------------------------|-------------------------------------------|
| 0        | 192.85          | 3.05E-05                                  | 5.20E-05                                  |
| 1        | 50.76           | 1.13E-04                                  | 1.97E-04                                  |
| 0.239    | 152.50          | 3.71E-05                                  | 6.53E-05                                  |
| 0.517    | 105.45          | 5.52E-05                                  | 9.87E-05                                  |
| 0.746    | 74.45           | 8.58E-05                                  | 1.42E-04                                  |
| <i>f</i> | 0.369141        | 0.10605                                   | -0.01906                                  |

**[C<sub>4</sub>C<sub>1</sub>pyrr][NTf<sub>2</sub>][Me<sub>2</sub>PO<sub>4</sub>], 6** ( $\chi$  [NTf<sub>2</sub>]<sup>-</sup>)

| $\chi$   | $\eta$<br>mPa s | $\Lambda_{m,Imp}$<br>Sm <sup>2</sup> /mol | $\Lambda_{m,NMR}$<br>Sm <sup>2</sup> /mol |
|----------|-----------------|-------------------------------------------|-------------------------------------------|
| 0        | 718.20          | N/A                                       | N/A                                       |
| 1        | 76.57           | 8.49E-05                                  | 1.32E-04                                  |
| 0.285    | 451.27          | 1.14E-05                                  | 2.39E-05                                  |
| 0.445    | 329.57          | 1.67E-05                                  | 3.05E-05                                  |
| 0.600    | 208.57          | 2.57E-05                                  | 4.60E-05                                  |
| <i>f</i> | 0.745323        | -0.58486                                  | -0.80026                                  |

**[C<sub>4</sub>C<sub>1</sub>im][NTf<sub>2</sub>][Me<sub>2</sub>PO<sub>4</sub>], 7** ( $\chi$  [NTf<sub>2</sub>]<sup>-</sup>)

| $\chi$   | $\eta$<br>mPa s | $\Lambda_{m,Imp}$<br>Sm <sup>2</sup> /mol | $\Lambda_{m,NMR}$<br>Sm <sup>2</sup> /mol |
|----------|-----------------|-------------------------------------------|-------------------------------------------|
| 1        | 50.76           | 1.13E-04                                  | 1.97E-04                                  |
| 0        | 647.30          | 6.33E-06                                  | 1.79E-05                                  |
| 0.387    | 327.63          | 1.68E-05                                  | N/A                                       |
| 0.271    | N/A             | 1.04E-05                                  | 2.46E-05                                  |
| 0.690    | 119.67          | 5.58E-05                                  | 8.43E-05                                  |
| 0.838    | 80.50           | 8.04E-05                                  | 1.27E-04                                  |
| <i>f</i> | 0.513739        | 2.16714                                   | -0.20031                                  |

**[C<sub>4</sub>C<sub>1</sub>im][Me-DBU][MeSO<sub>4</sub>], 8** ( $\chi$  [C<sub>4</sub>C<sub>1</sub>im]<sup>+</sup>)

| $\chi$   | $\eta$<br>mPa s | $\Lambda_{m,Imp}$<br>Sm <sup>2</sup> /mol | $\Lambda_{m,NMR}$<br>Sm <sup>2</sup> /mol |
|----------|-----------------|-------------------------------------------|-------------------------------------------|
| 1        | 192.85          | 3.05E-05                                  | 5.20E-05                                  |
| 0        | 718.33          | N/A                                       | N/A                                       |
| 0.363    | 422.71          | N/A                                       | 2.66E-05                                  |
| 0.641    | 269.73          | 2.60E-05                                  | 3.57E-05                                  |
| <i>f</i> | -0.45092        |                                           |                                           |

**[C<sub>4</sub>C<sub>1</sub>im][C<sub>1</sub>C<sub>1</sub>C<sub>1</sub>pz][OTf], 9** ( $\chi$  [C<sub>4</sub>C<sub>1</sub>im]<sup>+</sup>)

| $\chi$   | $\eta$<br>mPa s | $\Lambda_{m,Imp}$<br>Sm <sup>2</sup> /mol | $\Lambda_{m,NMR}$<br>Sm <sup>2</sup> /mol |
|----------|-----------------|-------------------------------------------|-------------------------------------------|
| 1        | 86.82           | 6.53E-05                                  | 1.22E-04                                  |
| 0        | 92.72           | 5.99E-05                                  | 1.24E-04                                  |
| 0.264    | 90.57           | 7.02E-05                                  | 1.25E-04                                  |
| 0.734    | 86.48           | 6.78E-05                                  | 1.12E-04                                  |
| 0.490    | 88.66           | 7.03E-05                                  | 1.23E-04                                  |
| <i>f</i> | -0.06416        | 0.51506                                   | -0.07801                                  |

**[C<sub>4</sub>C<sub>1</sub>im][Me-DBU][MeSO<sub>4</sub>][NTf<sub>2</sub>], 10** ( $\chi$  [Me-DBU][MeSO<sub>4</sub>]<sup>+</sup>)

| $\chi$   | $\eta$<br>mPa s | $\Lambda_{m,Imp}$<br>Sm <sup>2</sup> /mol | $\Lambda_{m,NMR}$<br>Sm <sup>2</sup> /mol |
|----------|-----------------|-------------------------------------------|-------------------------------------------|
| 0        | 50.76           | 1.13E-04                                  | 1.97E-04                                  |
| 1        | 718.33          | N/A                                       | N/A                                       |
| 0.814    | 395.65          | 1.40E-05                                  | 2.80E-05                                  |
| 0.602    | 216.10          | 2.56E-05                                  | 4.61E-05                                  |
| 0.418    | 138.35          | 3.94E-05                                  | 6.78E-05                                  |
| 0.207    | 82.95           | 6.70E-05                                  | 1.19E-04                                  |
| <i>f</i> | -0.55309        | 0.03783                                   | -0.1081                                   |

**[C<sub>4</sub>C<sub>1</sub>im][C<sub>4</sub>C<sub>1</sub>pyrr][OTf][NTf<sub>2</sub>], 11** ( $\chi$  [C<sub>4</sub>C<sub>1</sub>im][OTf]<sup>+</sup>)

| $\chi$   | $\eta$<br>mPa s | $\Lambda_{m,Imp}$<br>Sm <sup>2</sup> /mol | $\Lambda_{m,NMR}$<br>Sm <sup>2</sup> /mol |
|----------|-----------------|-------------------------------------------|-------------------------------------------|
| 1        | 86.82           | 6.53E-05                                  | 1.22E-04                                  |
| 0        | 76.57           | 8.49E-05                                  | 1.32E-04                                  |
| 0.377    | 78.08           | 7.92E-05                                  | 1.29E-04                                  |
| 0.787    | 85.32           | 6.94E-05                                  | 1.30E-04                                  |
| 0.881    | 85.09           | 8.01E-05                                  | 1.22E-04                                  |
| 0.602    | 80.55           | 8.44E-05                                  | 1.27E-04                                  |
| 0.233    | 77.44           | 9.32E-05                                  | 1.34E-04                                  |
| <i>f</i> | -0.10109        | 0.38719                                   | 0.10478                                   |

## 8. Thermal stabilities of ionic liquid mixtures

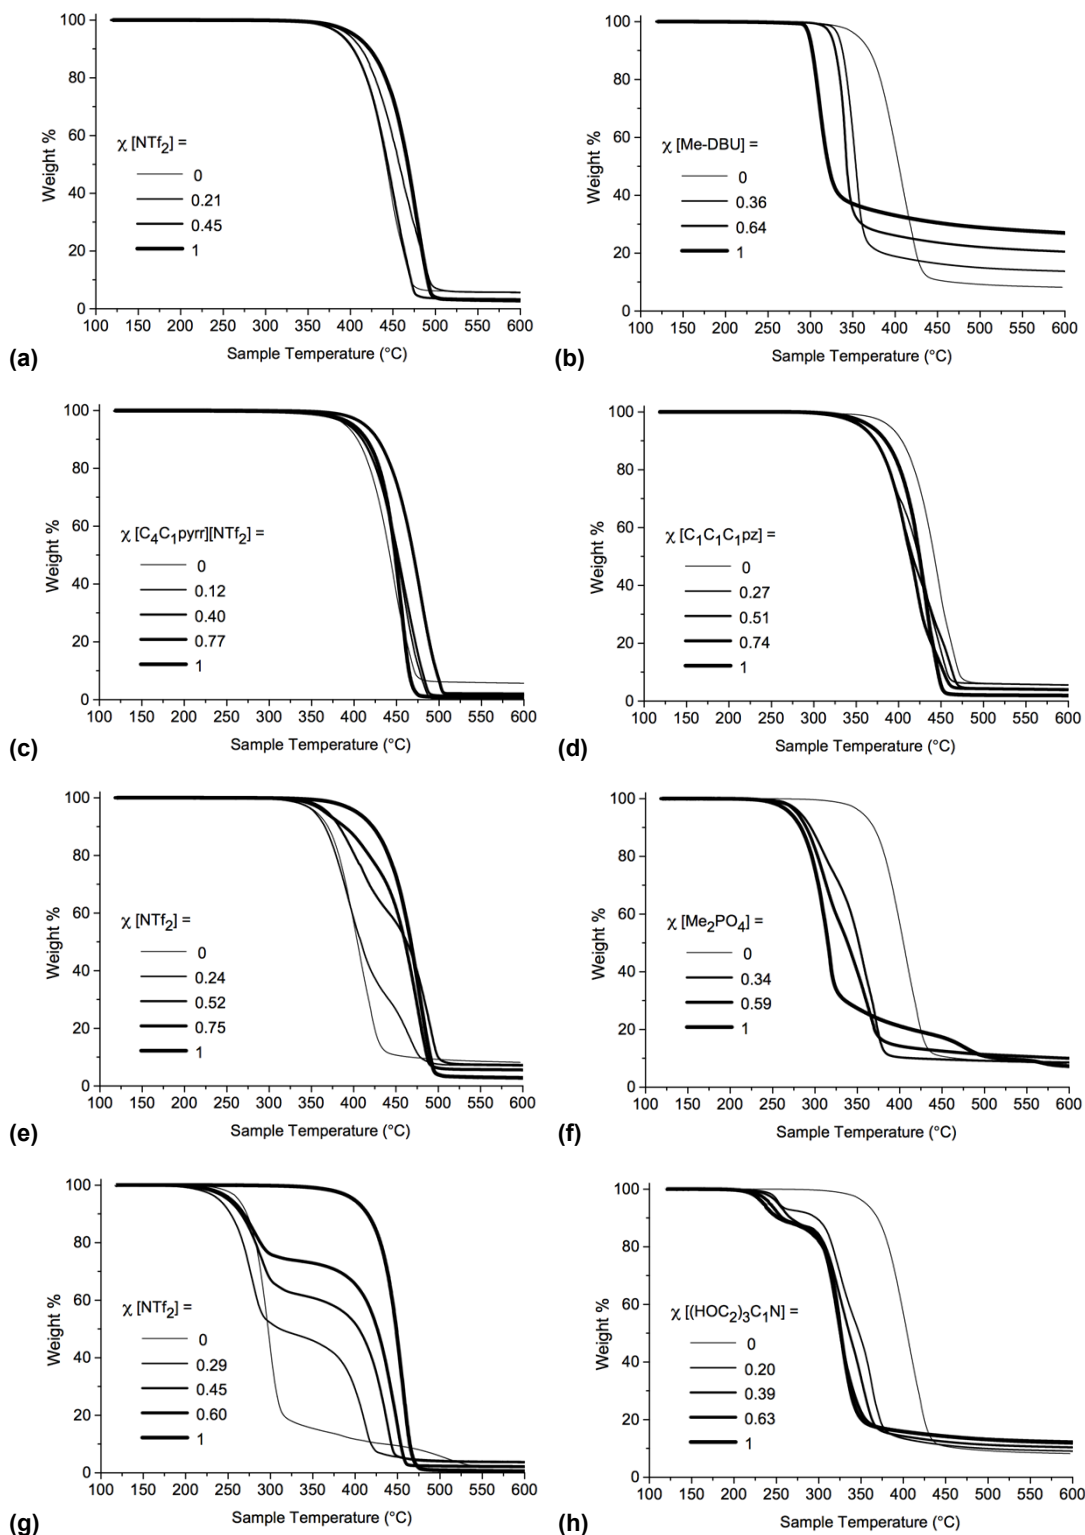

**Fig. E8** TGA thermographs for binary and reciprocal binary ionic liquid mixtures:

- (a) [C<sub>4</sub>C<sub>1</sub>im][OTf][NTf<sub>2</sub>], **3**.
- (b) [C<sub>4</sub>C<sub>1</sub>im][Me-DBU][MeSO<sub>4</sub>], **8**.
- (c) [C<sub>4</sub>C<sub>1</sub>im][C<sub>4</sub>C<sub>1</sub>pyrr][OTf][NTf<sub>2</sub>], **11**.
- (d) [C<sub>4</sub>C<sub>1</sub>im][C<sub>1</sub>C<sub>1</sub>C<sub>1</sub>pz][OTf], **9**.
- (e) [C<sub>4</sub>C<sub>1</sub>im][MeSO<sub>4</sub>][NTf<sub>2</sub>], **5**.
- (f) [C<sub>4</sub>C<sub>1</sub>im][MeSO<sub>4</sub>][Me<sub>2</sub>PO<sub>4</sub>], **2**.
- (g) [C<sub>4</sub>C<sub>1</sub>pyrr][NTf<sub>2</sub>][Me<sub>2</sub>PO<sub>4</sub>], **6**.
- (h) [C<sub>4</sub>C<sub>1</sub>im][(HOC<sub>2</sub>)<sub>3</sub>C<sub>1</sub>N][MeSO<sub>4</sub>], **4**.

**Table E6**  $T_{\text{onset}}$  values for neat ionic liquids and ionic liquid mixtures, measured using temperature-ramped TGA with a heating rate of  $10\text{ }^{\circ}\text{C min}^{-1}$  and nitrogen flow rate of  $20\text{ ml min}^{-1}$ . For thermographs that exhibit two or more weight loss steps, the  $T_{\text{onset}}$  refers to the first step.

| <u>[C<sub>4</sub>C<sub>1</sub>im][Cl][OTf], 1</u> |                            | <u>[C<sub>4</sub>C<sub>1</sub>im][MeSO<sub>4</sub>][Me<sub>2</sub>PO<sub>4</sub>], 2</u> |                            | <u>[C<sub>4</sub>C<sub>1</sub>im][OTf][NTf<sub>2</sub>], 3</u> |                            |
|---------------------------------------------------|----------------------------|------------------------------------------------------------------------------------------|----------------------------|----------------------------------------------------------------|----------------------------|
| $\chi$ Cl <sup>-</sup>                            | $T_{\text{onset}}$<br>(°C) | $\chi$ [Me <sub>2</sub> PO <sub>4</sub> ] <sup>-</sup>                                   | $T_{\text{onset}}$<br>(°C) | $\chi$ [NTf <sub>2</sub> ] <sup>-</sup>                        | $T_{\text{onset}}$<br>(°C) |
| 0                                                 | 410                        | 0                                                                                        | 371                        | 0                                                              | 410                        |
| 0.106                                             | 253                        | 0.336                                                                                    | 278                        | 0.209                                                          | 419                        |
| 0.192                                             | 256                        | 0.587                                                                                    | 282                        | 0.454                                                          | 412                        |
| 0.303                                             | 257                        | 1                                                                                        | 282                        | 0.626                                                          | 418                        |
| 0.402                                             | 258                        |                                                                                          |                            | 1                                                              | 438                        |
| 1                                                 | 255                        |                                                                                          |                            |                                                                |                            |

  

| <u>[C<sub>4</sub>C<sub>1</sub>im][(HOC<sub>2</sub>)<sub>3</sub>C<sub>1</sub>N][MeSO<sub>4</sub>], 4</u> |                            | <u>[C<sub>4</sub>C<sub>1</sub>im][MeSO<sub>4</sub>][NTf<sub>2</sub>], 5</u> |                            | <u>[C<sub>4</sub>C<sub>1</sub>pyrr][NTf<sub>2</sub>][Me<sub>2</sub>PO<sub>4</sub>], 6</u> |                            |
|---------------------------------------------------------------------------------------------------------|----------------------------|-----------------------------------------------------------------------------|----------------------------|-------------------------------------------------------------------------------------------|----------------------------|
| $\chi$ [(HOC <sub>2</sub> ) <sub>3</sub> C <sub>1</sub> N] <sup>+</sup>                                 | $T_{\text{onset}}$<br>(°C) | $\chi$ [NTf <sub>2</sub> ] <sup>-</sup>                                     | $T_{\text{onset}}$<br>(°C) | $\chi$ [NTf <sub>2</sub> ] <sup>-</sup>                                                   | $T_{\text{onset}}$<br>(°C) |
| 0                                                                                                       | 371                        | 0                                                                           | 371                        | 0                                                                                         | 275                        |
| 0.201                                                                                                   | 241                        | 0.239                                                                       | 361                        | 0.285                                                                                     | 250                        |
| 0.391                                                                                                   | 242                        | 0.517                                                                       | 368                        | 0.445                                                                                     | 256                        |
| 0.630                                                                                                   | 228                        | 0.746                                                                       | 345                        | 0.600                                                                                     | 249                        |
| 0.811                                                                                                   | 221                        | 1                                                                           | 438                        | 1                                                                                         | 428                        |
| 1                                                                                                       | 219                        |                                                                             |                            |                                                                                           |                            |

  

| <u>[C<sub>4</sub>C<sub>1</sub>im][NTf<sub>2</sub>][Me<sub>2</sub>PO<sub>4</sub>], 7</u> |                            | <u>[C<sub>4</sub>C<sub>1</sub>im][Me-DBU][MeSO<sub>4</sub>], 8</u> |                            | <u>[C<sub>4</sub>C<sub>1</sub>im][C<sub>1</sub>C<sub>1</sub>C<sub>1</sub>pz][OTf], 9</u> |                            |
|-----------------------------------------------------------------------------------------|----------------------------|--------------------------------------------------------------------|----------------------------|------------------------------------------------------------------------------------------|----------------------------|
| $\chi$ [NTf <sub>2</sub> ] <sup>-</sup>                                                 | $T_{\text{onset}}$<br>(°C) | $\chi$ [Me-DBU] <sup>+</sup>                                       | $T_{\text{onset}}$<br>(°C) | $\chi$ [C <sub>1</sub> C <sub>1</sub> C <sub>1</sub> pz] <sup>+</sup>                    | $T_{\text{onset}}$<br>(°C) |
| 0                                                                                       | 282                        | 0                                                                  | 371                        | 0                                                                                        | 410                        |
| 0.150                                                                                   | 279                        | 0.359                                                              | 336                        | 0.266                                                                                    | 365                        |
| 0.271                                                                                   | 266                        | 0.637                                                              | 332                        | 0.510                                                                                    | 372                        |
| 0.387                                                                                   | 282                        | 1                                                                  | 297                        | 0.736                                                                                    | 377                        |
| 0.500                                                                                   | 280                        |                                                                    |                            | 1                                                                                        | 395                        |
| 0.690                                                                                   | 292                        |                                                                    |                            |                                                                                          |                            |
| 0.838                                                                                   | 274                        |                                                                    |                            |                                                                                          |                            |
| 1                                                                                       | 438                        |                                                                    |                            |                                                                                          |                            |

  

| <u>[C<sub>4</sub>C<sub>1</sub>im][Me-DBU][MeSO<sub>4</sub>][NTf<sub>2</sub>], 10</u> |                            | <u>[C<sub>4</sub>C<sub>1</sub>im][C<sub>4</sub>C<sub>1</sub>pyrr][OTf][NTf<sub>2</sub>], 11</u> |                            |
|--------------------------------------------------------------------------------------|----------------------------|-------------------------------------------------------------------------------------------------|----------------------------|
| $\chi$ [Me-DBU][MeSO <sub>4</sub> ]                                                  | $T_{\text{onset}}$<br>(°C) | $\chi$ [C <sub>4</sub> C <sub>1</sub> pyrr][NTf <sub>2</sub> ]                                  | $T_{\text{onset}}$<br>(°C) |
| 0                                                                                    | 438                        | 0                                                                                               | 410                        |
| 0.207                                                                                | 355                        | 0.119                                                                                           | 419                        |
| 0.418                                                                                | 358                        | 0.213                                                                                           | 406                        |
| 0.602                                                                                | 355                        | 0.398                                                                                           | 417                        |
| 0.814                                                                                | 333                        | 0.623                                                                                           | 414                        |
| 1                                                                                    | 297                        | 0.767                                                                                           | 439                        |
|                                                                                      |                            | 1                                                                                               | 428                        |

## 9. Computational procedures

DFT calculations were performed using the GAUSSIAN 09 suite of programs.<sup>3</sup> The B3LYP (Becke's three-parameter exchange<sup>4</sup> in combination with the Lee, Yang, Parr correlation<sup>5</sup>) functional was employed for all calculations together with the 6-311+G(d,p) basis set.

Convergence criteria were tightened above the default Gaussian values to  $10^{-9}$  on the RMS density matrix and  $10^{-7}$  on the energy. In addition, the numerical integration grid was enhanced from the default, with an optimized grid of 99 radial shells and 590 angular points per shell. The tighter convergence criteria were employed for all calculations (volume, charge arm). All optimized structures were confirmed as minima by frequency analysis. All calculations were performed under no symmetry constraints. Volume calculations were performed for all cations and anions, using the 'volume', 'iop(6/45=100)' and 'iop(6/66=20)' keywords. Volume calculations were performed 10 times for each ion conformation in order to obtain approximate error values, extreme outliers were omitted. Raman calculations were carried out using the 'freq=raman' keyword.

## 10. Molar volume calculations, charge arm calculations and Raman spectroscopy

**Table E7** Calculated molar volumes,  $V_m$ , and charge arm lengths,  $R_{ca}$ ,<sup>6</sup> of the investigated ions. All calculations were performed at the B3LYP / 6-311+G(d,p) level of theory. Molar volumes were obtained from 10 repeats.

| Ion                                                                       | $V_m$ (cm <sup>3</sup> mol <sup>-1</sup> ) | $R_{ca}$ (Å) | Ion                                                      | $V_m$ (cm <sup>3</sup> mol <sup>-1</sup> ) | $R_{ca}$ (Å) |
|---------------------------------------------------------------------------|--------------------------------------------|--------------|----------------------------------------------------------|--------------------------------------------|--------------|
| [C <sub>4</sub> C <sub>1</sub> im] <sup>+</sup>                           | 118 ± 7                                    | 1.20         | Cl <sup>-</sup>                                          | 32 ± 5                                     | 0            |
| [C <sub>4</sub> C <sub>1</sub> pyrr] <sup>+</sup>                         | 132 ± 6                                    | 0.63         | [MeSO <sub>4</sub> ] <sup>-</sup>                        | 68 ± 6                                     | 1.04         |
| [C <sub>1</sub> C <sub>1</sub> C <sub>1</sub> pz] <sup>+</sup>            | 94 ± 3                                     | 0.51         | [OTf] <sup>-</sup>                                       | 70 ± 9                                     | 0.52         |
| [Me-DBU] <sup>+</sup>                                                     | 142 ± 11                                   | 0.44         | [NTf <sub>2</sub> ] <sup>-</sup> <i>cis</i>              | 130 ± 4                                    | 0.81         |
| [(HOC <sub>2</sub> ) <sub>3</sub> C <sub>1</sub> N] <sup>+</sup> <i>a</i> | 132 ± 7                                    | 1.56         | [NTf <sub>2</sub> ] <sup>-</sup> <i>trans</i>            | 129 ± 8                                    | 0.03         |
| [(HOC <sub>2</sub> ) <sub>3</sub> C <sub>1</sub> N] <sup>+</sup> <i>b</i> | 131 ± 6                                    | 0.50         | [Me <sub>2</sub> PO <sub>4</sub> ] <sup>-</sup> <i>a</i> | 87 ± 5                                     | 0.49         |
|                                                                           |                                            |              | [Me <sub>2</sub> PO <sub>4</sub> ] <sup>-</sup> <i>b</i> | 88 ± 5                                     | 1.42         |
|                                                                           |                                            |              | [Me <sub>2</sub> PO <sub>4</sub> ] <sup>-</sup> <i>c</i> | 90 ± 7                                     | 1.33         |

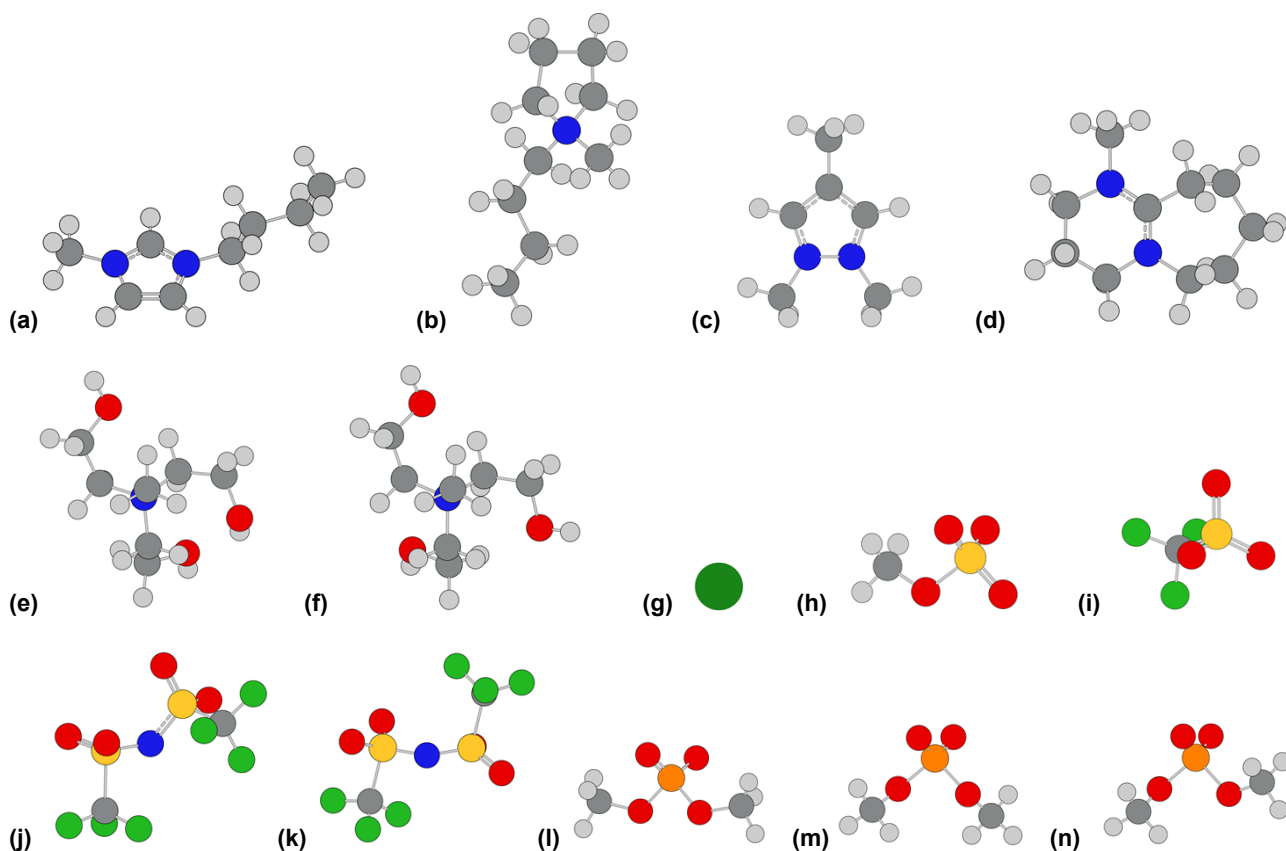

**Fig. E9** Cations and anions, optimized at the B3LYP / 6-311+G(d,p) level of theory: (a) [C<sub>4</sub>C<sub>1</sub>im]<sup>+</sup>; (b) [C<sub>4</sub>C<sub>1</sub>pyrr]<sup>+</sup>; (c) [C<sub>1</sub>C<sub>1</sub>C<sub>1</sub>pz]<sup>+</sup>; (d) [Me-DBU]<sup>+</sup>; (e) [(HOC<sub>2</sub>)<sub>3</sub>C<sub>1</sub>N]<sup>+</sup> *a*; (f) [(HOC<sub>2</sub>)<sub>3</sub>C<sub>1</sub>N]<sup>+</sup> *b*; (g) Cl<sup>-</sup>; (h) [MeSO<sub>4</sub>]<sup>-</sup>; (i) [OTf]<sup>-</sup>; (j) [NTf<sub>2</sub>]<sup>-</sup> *cis*; (k) [NTf<sub>2</sub>]<sup>-</sup> *trans*; (l) [Me<sub>2</sub>PO<sub>4</sub>]<sup>-</sup> *a*; (m) [Me<sub>2</sub>PO<sub>4</sub>]<sup>-</sup> *b*; (n) [Me<sub>2</sub>PO<sub>4</sub>]<sup>-</sup> *c*.

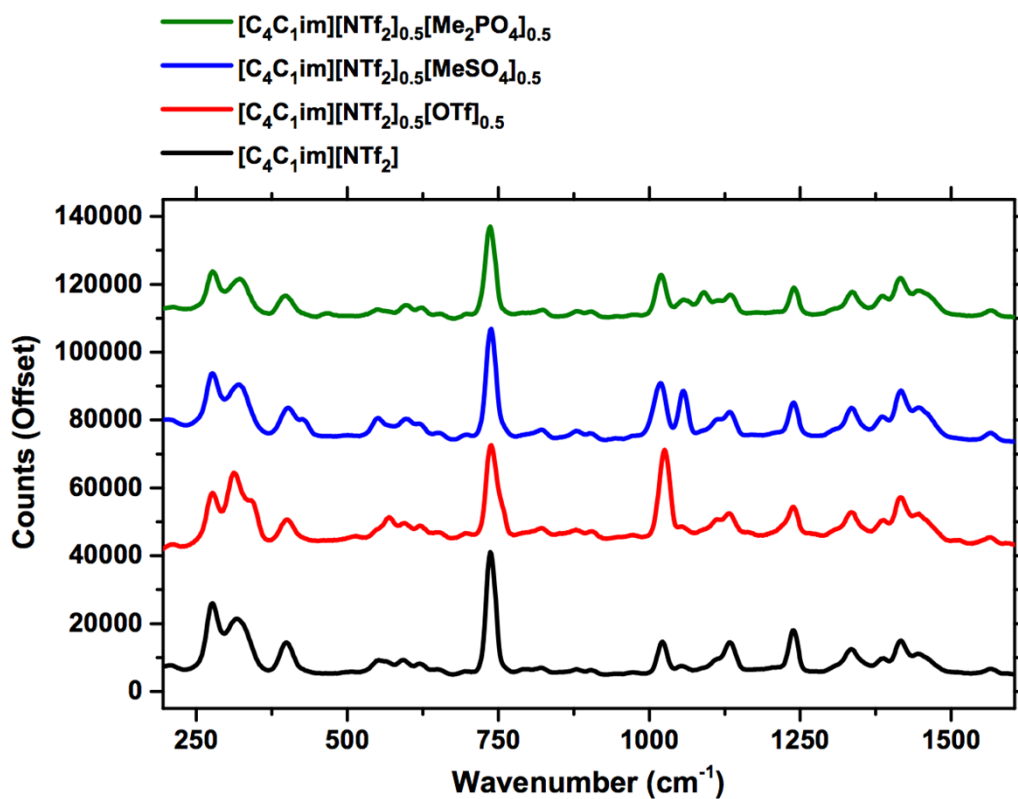

(a)

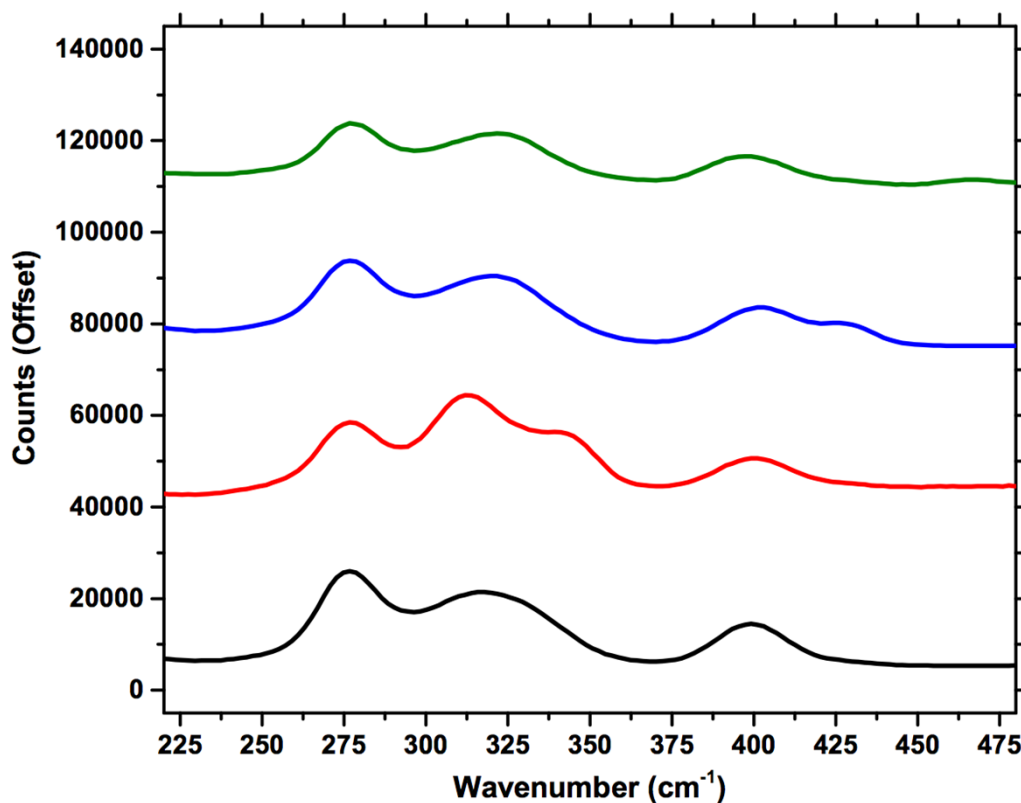

(b)

**Fig. E10** Raman spectra for neat ionic liquid [C<sub>4</sub>C<sub>1</sub>im][NTf<sub>2</sub>], and binary ionic liquid mixtures [C<sub>4</sub>C<sub>1</sub>im][NTf<sub>2</sub>]<sub>0.5</sub>[OTf]<sub>0.5</sub>, **3**, [C<sub>4</sub>C<sub>1</sub>im][NTf<sub>2</sub>]<sub>0.5</sub>[MeSO<sub>4</sub>]<sub>0.5</sub>, **5**, and [C<sub>4</sub>C<sub>1</sub>im][NTf<sub>2</sub>]<sub>0.5</sub>[Me<sub>2</sub>PO<sub>4</sub>]<sub>0.5</sub>, **7**: (a) Full spectra; (b) in the region 220 - 480 cm<sup>-1</sup>. The exposure time for each spectrum was 2 seconds.

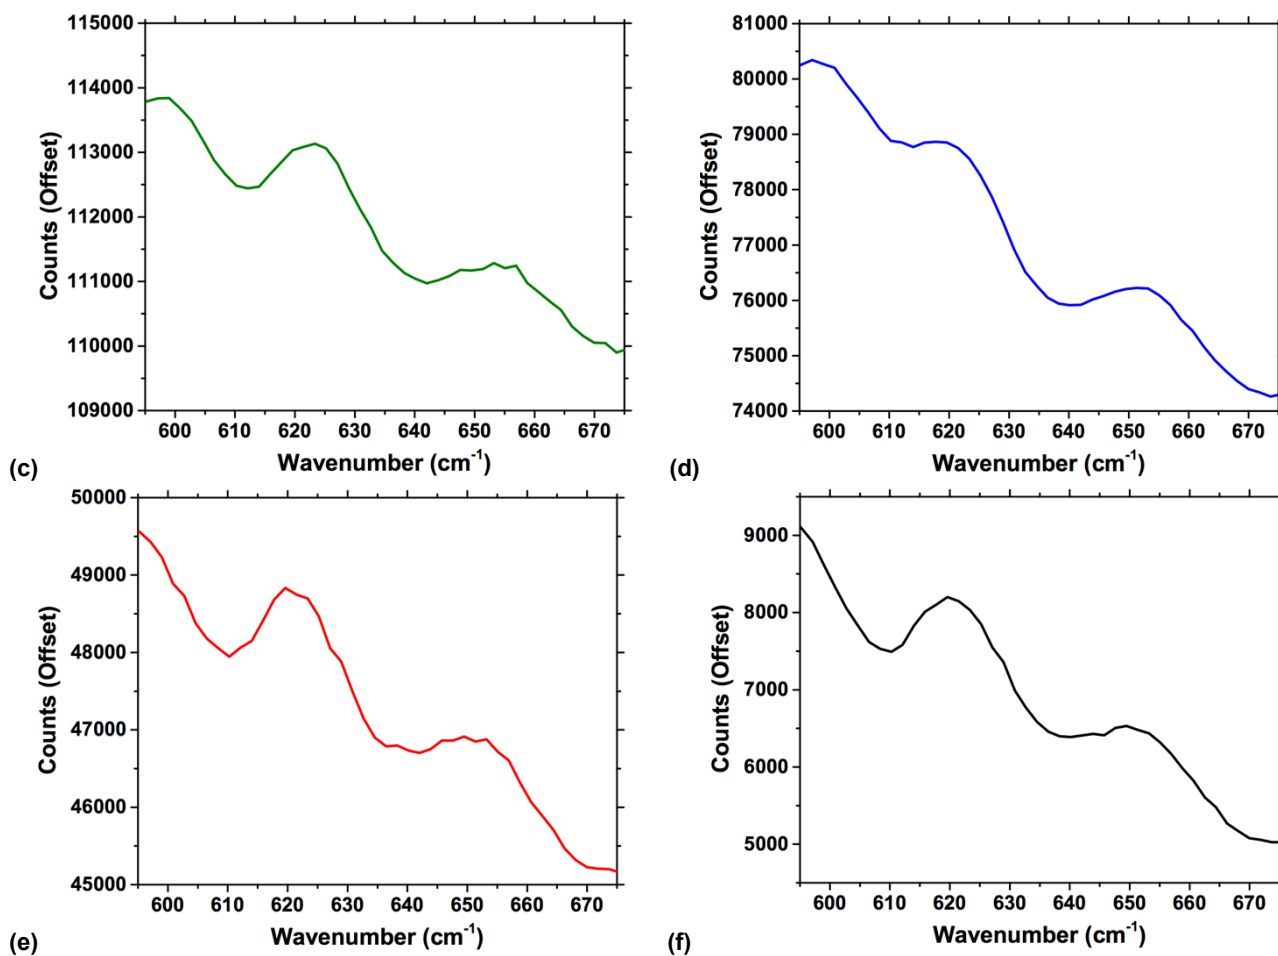

**Fig. E10 continued** Raman spectra in the region 595 - 675 cm<sup>-1</sup>, for binary mixtures [C<sub>4</sub>C<sub>1</sub>im][NTf<sub>2</sub>]<sub>0.5</sub>[Me<sub>2</sub>PO<sub>4</sub>]<sub>0.5</sub>, **7**, (c), [C<sub>4</sub>C<sub>1</sub>im][NTf<sub>2</sub>]<sub>0.5</sub>[MeSO<sub>4</sub>]<sub>0.5</sub>, **5**, (d), [C<sub>4</sub>C<sub>1</sub>im][NTf<sub>2</sub>]<sub>0.5</sub>[OTf]<sub>0.5</sub>, **3**, (e), and neat ionic liquid [C<sub>4</sub>C<sub>1</sub>im][NTf<sub>2</sub>], (f). The exposure time for each spectrum was 2 seconds.

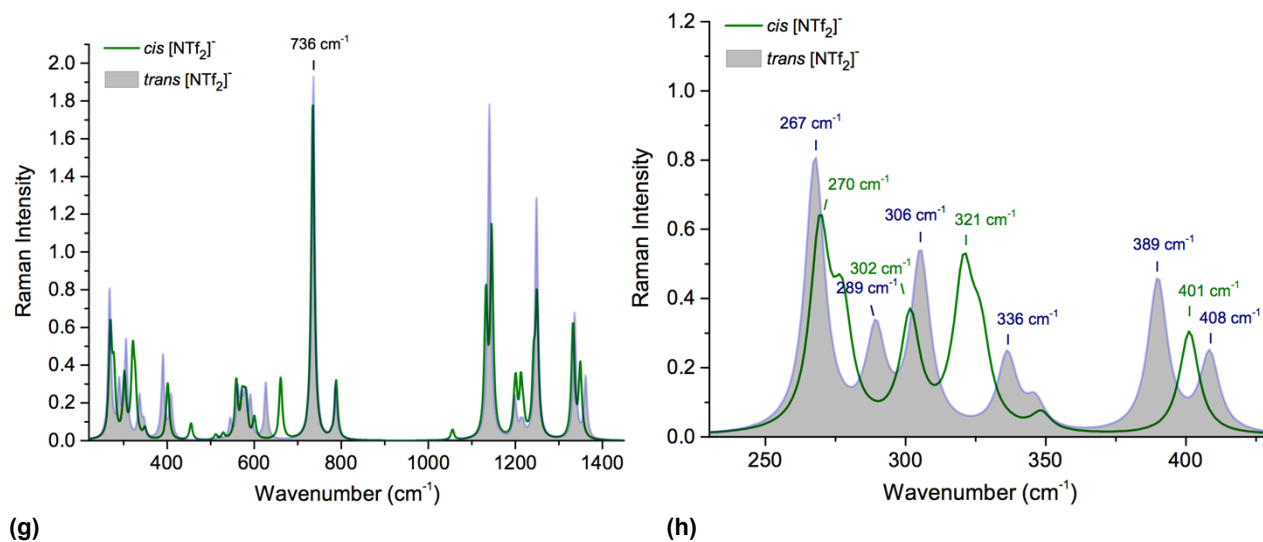

**Fig. E10 continued** DFT Raman spectra for the isolated *bis*(trifluoromethanesulfonyl)imide, [NTf<sub>2</sub>]<sup>-</sup>, anion, calculated at the B3LYP / 6-311+G(d,p) level of theory: (g) full spectra; (h) in the region 230 - 430 cm<sup>-1</sup>.

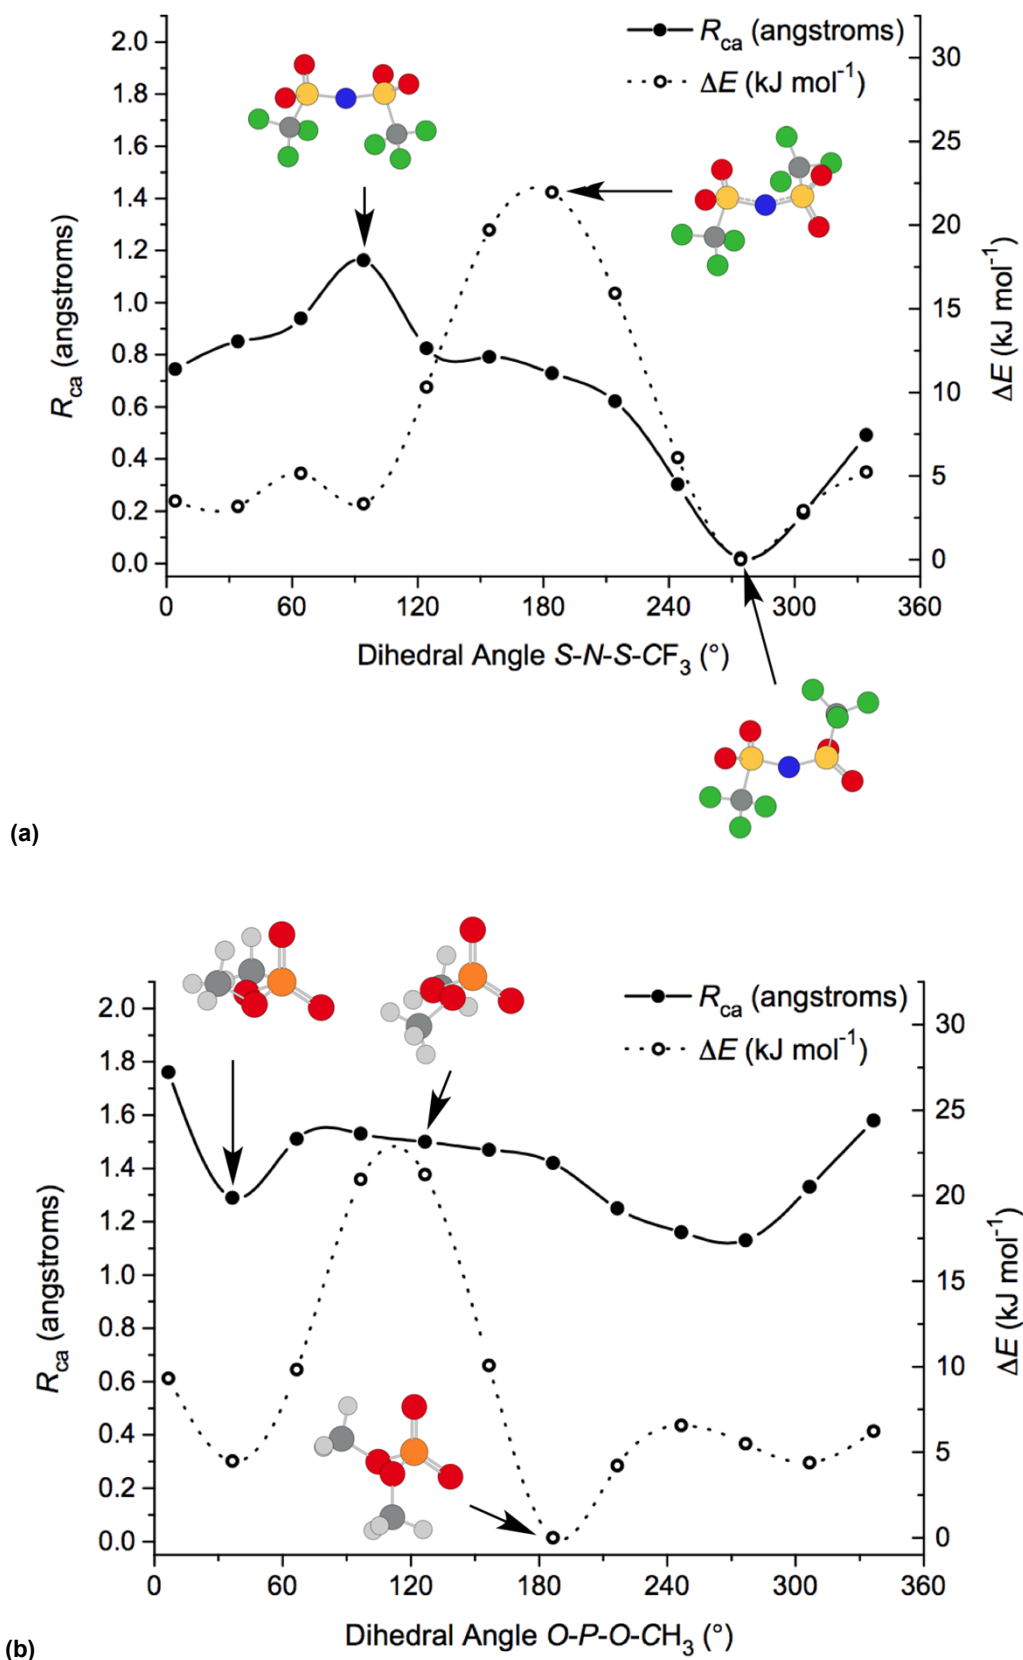

**Fig. E11** Diagram demonstrating the influence of ion geometry on both the charge arm,  $R_{ca}$ , and the SCF energy,  $\Delta E$  ( $kJ\ mol^{-1}$ ) for anions: (a) *bis*(trifluoromethanesulfonyl)imide,  $[NTf_2]^-$ ; (b) dimethyl phosphate,  $[Me_2PO_4]^-$ .  $\Delta E$  energy values are uncorrected.

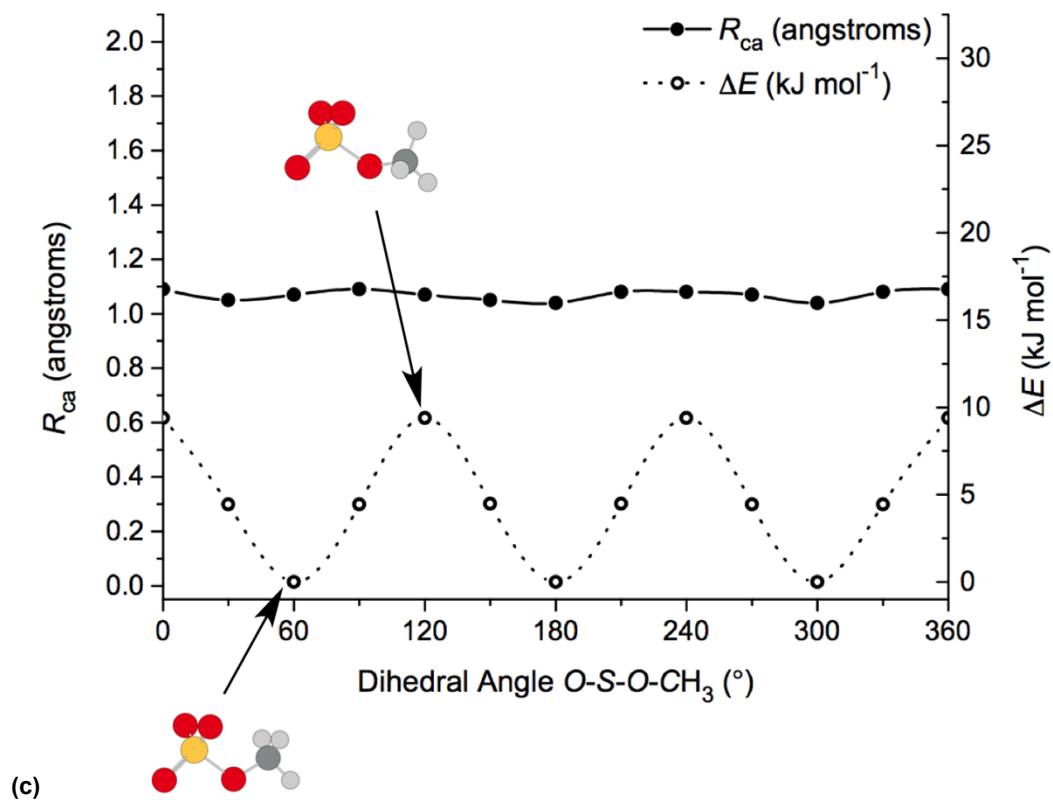

**Fig. E11 continued** Diagram demonstrating the influence of ion geometry on both the charge arm,  $R_{ca}$ , and the SCF energy,  $\Delta E$  ( $\text{kJ mol}^{-1}$ ) for anion: (c) methyl sulfate,  $[\text{MeSO}_4]^-$ .  $\Delta E$  energy values are uncorrected.



**Table E8** (a) Calculated charge arm lengths,  $R_{ca}$ ,<sup>6</sup> for  $[C_nC_1im]^+$  ( $n = 1 - 10$ ) cations, investigated previously by Canongia Lopes *et al*<sup>7</sup>; (b), (c), (d) Calculated charge arm lengths,  $R_{ca}$ , for  $[C_n(C_1)_3N]^+$  ( $n = 1 - 14$ ) cations and  $[C_nCO_2]^-$ ,  $[C_nSO_4]^-$  anions ( $n = 1 - 14$ ). All calculations were performed at the B3LYP / 6-311+G(d,p) level of theory, using the NBO charges on atoms.

| (a)                  |              | (b)                     |              | (c)                 |              | (d)                 |              |
|----------------------|--------------|-------------------------|--------------|---------------------|--------------|---------------------|--------------|
| $[C_nC_1im]^+$ $n =$ | $R_{ca}$ (Å) | $[C_n(C_1)_3N]^+$ $n =$ | $R_{ca}$ (Å) | $[C_nCO_2]^-$ $n =$ | $R_{ca}$ (Å) | $[C_nSO_4]^-$ $n =$ | $R_{ca}$ (Å) |
| 1                    | 0.16         | 1                       | 0.00         | 1                   | 0.97         | 1                   | 1.07         |
| 2                    | 0.36         | 2                       | 0.30         | 2                   | 1.31         | 2                   | 1.46         |
| 3                    | 0.75         | 3                       | 0.70         | 3                   | 1.83         | 3                   | 1.87         |
| 4                    | 1.20         | 4                       | 1.17         | 4                   | 2.31         | 4                   | 2.33         |
| 5                    | 1.70         | 5                       | 1.68         | 5                   | 2.92         | 5                   | 2.81         |
| 6                    | 2.22         | 6                       | 2.22         | 6                   | 3.49         | 6                   | 3.32         |
| 7                    | 2.77         | 7                       | 2.77         | 7                   | 4.04         | 7                   | 3.85         |
| 8                    | 3.33         | 8                       | 3.34         | 8                   | 4.67         | 8                   | 4.40         |
| 9                    | 3.90         | 9                       | 3.93         | 9                   | 5.23         | 9                   | 4.96         |
| 10                   | 4.49         | 10                      | 4.51         | 10                  | 5.87         | 10                  | 5.53         |
|                      |              | 11                      | 5.12         | 11                  | 6.45         | 11                  | 6.10         |
|                      |              | 12                      | 5.72         | 12                  | 7.10         | 12                  | 6.69         |
|                      |              | 13                      | 6.33         | 13                  | 7.74         | 13                  | 7.28         |
|                      |              | 14                      | 6.94         | 14                  | 8.35         | 14                  | 7.87         |

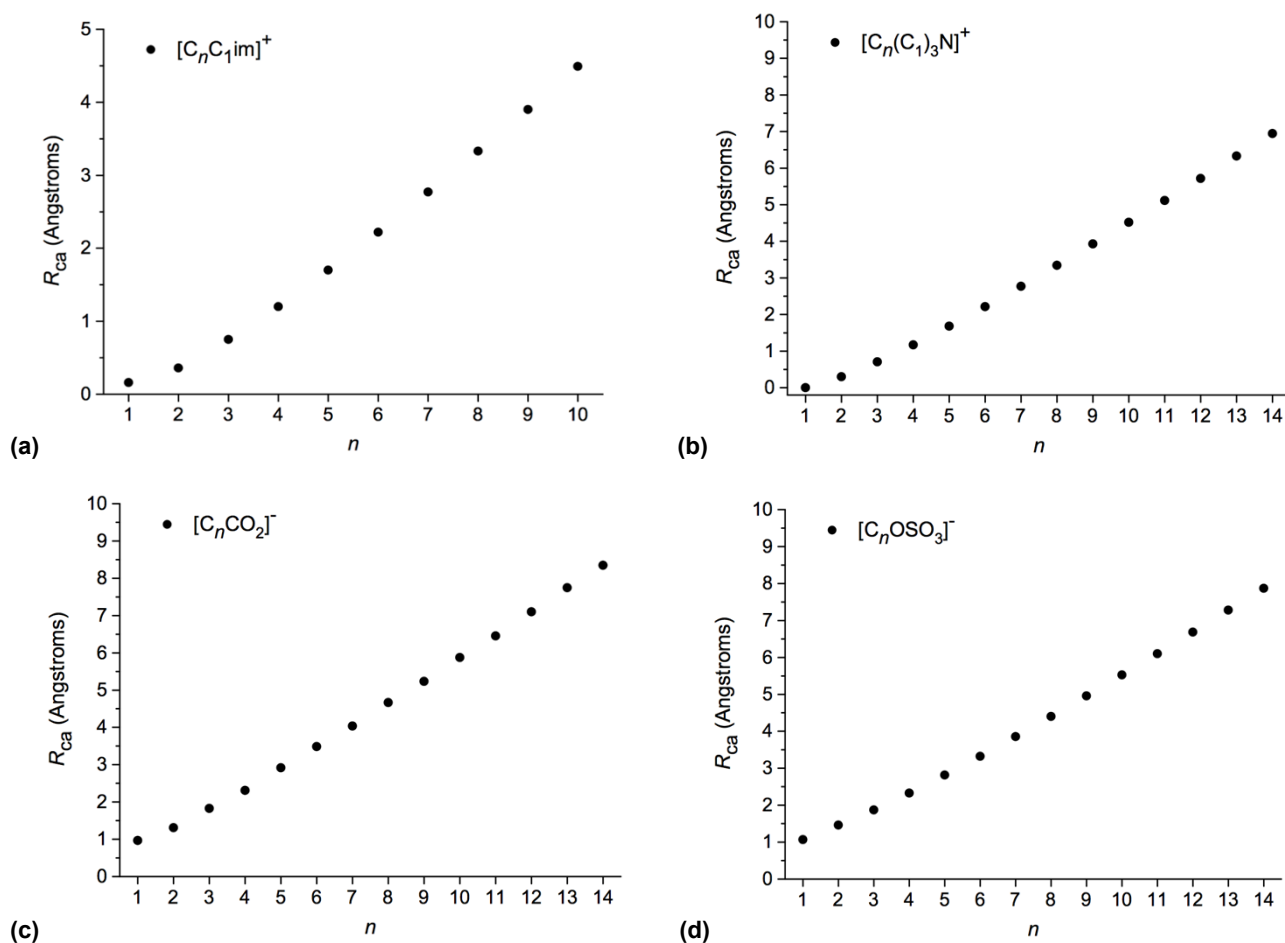

**Fig. E12** (a) Graph representing the charge arm length,  $R_{ca}$ , for  $[C_nC_1im]^+$  ( $n = 1 - 10$ ) cations, investigated previously by Canongia Lopes *et al*<sup>7</sup>; (b), (c), (d) Graphs representing the charge arm lengths,  $R_{ca}$ , for  $[C_n(C_1)_3N]^+$  ( $n = 1 - 14$ ) cations and  $[C_nCO_2]^-$ ,  $[C_nSO_4]^-$  anions ( $n = 1 - 14$ ). All calculations were performed at the B3LYP / 6-311+G(d,p) level of theory, using the NBO charges on atoms.

## References

1. M. P. Cecchini, M. A. Stapountzi, D. W. McComb, T. Albrecht and J. B. Edel, *Anal. Chem.*, 2011, **83**, 1418.
2. M. P. Cecchini, J. Hong, C. Lim, J. Choo, T. Albrecht, A. J. Demello and J. B. Edel, *Anal. Chem.*, 2011, **83**, 3076.
3. Gaussian 09, Revision B.01, M. J. Frisch, G. W. Trucks, H. B. Schlegel, G. E. Scuseria, M. A. Robb, J. R. Cheeseman, G. Scalmani, V. Barone, B. Mennucci, G. A. Petersson, H. Nakatsuji, M. Caricato, X. Li, H. P. Hratchian, A. F. Izmaylov, J. Bloino, G. Zheng, J. L. Sonnenberg, M. Hada, M. Ehara, K. Toyota, R. Fukuda, J. Hasegawa, M. Ishida, T. Nakajima, Y. Honda, O. Kitao, H. Nakai, T. Vreven, J. A. Montgomery, Jr., J. E. Peralta, F. Ogliaro, M. Bearpark, J. J. Heyd, E. Brothers, K. N. Kudin, V. N. Staroverov, R. Kobayashi, J. Normand, K. Raghavachari, A. Rendell, J. C. Burant, S. S. Iyengar, J. Tomasi, M. Cossi, N. Rega, J. M. Millam, M. Klene, J. E. Knox, J. B. Cross, V. Bakken, C. Adamo, J. Jaramillo, R. Gomperts, R. E. Stratmann, O. Yazyev, A. J. Austin, R. Cammi, C. Pomelli, J. W. Ochterski, R. L. Martin, K. Morokuma, V. G. Zakrzewski, G. A. Voth, P. Salvador, J. J. Dannenberg, S. Dapprich, A. D. Daniels, Ö. Farkas, J. B. Foresman, J. V. Ortiz, J. Cioslowski, and D. J. Fox, Gaussian, Inc., Wallingford CT, 2010.
4. A. D. Becke, *J. Chem. Phys.*, 1993, **98**, 5648.
5. C. Lee, W. Yang and R. G. Parr, *Phys. Rev. B: Condens. Matter*, 1988, **37**, 785.
6. H. Niedermeyer, M. A. Ab Rani, P. D. Lickiss, J. P. Hallett, T. Welton, A. J. P. White and P. A. Hunt, *Physical Chemistry Chemical Physics*, 2010, **12**, 2018.
7. J. N. Canongia Lopes, T. C. Cordeiro, J. M. S. S. Esperança, H. J. R. Guedes, S. Huq, L. P. N. Rebelo and K. R. Seddon, *J. Phys. Chem. B*, 2005, **109**, 3519.
